# Supplementary material for: Mapping the planet’s critical natural assets
Source: Research Square preprint supplement (doi:10.21203/rs.3.rs-1569773/v1), 2022-04-22
Supplement: Supplementary file [file e32c0c1fcd8004c46c2eb827.pdf]

**SI Table 1. Percentage of land and waters in critical natural assets for different analyses.**

| Country (ranked by land area)    | Total area (sq km) | Area of land (sq km) | Area of EEZ (sq km) | % of total area that is critical natural assets for local NCP (LCNA) | % of land that is natural assets | % of land that is LCNA | % of natural assets that are LCNA | % eez that is LCNA | % of land critical for global NCP (GCNA) | % overlap between LCNA and GCNA | % of LCNA not overlapping with GCNA | % of GCNA not overlapping with LCNA | Total % of land that contains LCNA and GCNA | LCNA % area selected across all 12 "drop 1" optimizations | LCNA % area selected across 11 of 12 "drop 1" optimizations |
|----------------------------------|--------------------|----------------------|---------------------|----------------------------------------------------------------------|----------------------------------|------------------------|-----------------------------------|--------------------|------------------------------------------|---------------------------------|-------------------------------------|-------------------------------------|---------------------------------------------|-----------------------------------------------------------|-------------------------------------------------------------|
| Global                           | 274,470,564        | 134,761,492          | 139,709,072         | 27.3%                                                                | 63.9%                            | 30.4%                  | 47.6%                             | 24.2%              | 38.5%                                    | 23.7%                           | 6.3%                                | 14.3%                               | 44.4%                                       | 61.9%                                                     | 96.9%                                                       |
| Russia                           | 24,615,504         | 16,924,348           | 7,691,156           | 18.5%                                                                | 86.2%                            | 17.8%                  | 20.7%                             | 20.1%              | 35.8%                                    | 14.9%                           | 2.7%                                | 20.4%                               | 38.0%                                       | 57.3%                                                     | 96.2%                                                       |
| Canada                           | 15,661,972         | 9,917,508            | 5,744,464           | 13.0%                                                                | 88.0%                            | 10.7%                  | 12.2%                             | 16.9%              | 27.8%                                    | 8.8%                            | 1.7%                                | 15.7%                               | 26.2%                                       | 59.5%                                                     | 98.3%                                                       |
| United States of America         | 21,628,792         | 9,467,504            | 12,161,288          | 24.7%                                                                | 75.8%                            | 37.4%                  | 49.3%                             | 14.8%              | 52.9%                                    | 34.1%                           | 3.0%                                | 18.1%                               | 55.2%                                       | 56.5%                                                     | 96.4%                                                       |
| China                            | 10,701,884         | 9,393,892            | 1,307,992           | 29.3%                                                                | 51.3%                            | 25.4%                  | 49.5%                             | 57.2%              | 38.1%                                    | 20.0%                           | 5.1%                                | 18.0%                               | 43.1%                                       | 54.9%                                                     | 96.9%                                                       |
| Brazil                           | 12,222,380         | 8,523,920            | 3,698,460           | 38.8%                                                                | 74.7%                            | 46.0%                  | 61.6%                             | 22.2%              | 70.5%                                    | 42.5%                           | 3.4%                                | 28.0%                               | 73.8%                                       | 62.4%                                                     | 96.1%                                                       |
| Australia                        | 16,745,092         | 7,723,376            | 9,021,716           | 23.5%                                                                | 87.1%                            | 24.4%                  | 28.0%                             | 22.7%              | 10.5%                                    | 5.6%                            | 18.6%                               | 4.2%                                | 28.4%                                       | 25.4%                                                     | 98.1%                                                       |
| India                            | 5,503,556          | 3,165,956            | 2,337,600           | 18.9%                                                                | 28.6%                            | 19.4%                  | 67.9%                             | 18.3%              | 19.9%                                    | 15.3%                           | 3.5%                                | 4.6%                                | 23.4%                                       | 71.7%                                                     | 94.9%                                                       |
| Argentina                        | 3,863,420          | 2,790,952            | 1,072,468           | 50.0%                                                                | 71.4%                            | 44.2%                  | 61.9%                             | 65.4%              | 23.0%                                    | 18.8%                           | 25.2%                               | 4.3%                                | 48.2%                                       | 48.3%                                                     | 97.1%                                                       |
| Kazakhstan                       | 2,826,860          | 2,712,492            | 114,368             | 33.8%                                                                | 64.3%                            | 35.2%                  | 54.8%                             | 0.3%               | 55.3%                                    | 30.9%                           | 3.8%                                | 24.2%                               | 58.8%                                       | 40.4%                                                     | 94.8%                                                       |
| Democratic Republic of the Congo | 2,354,184          | 2,340,724            | 13,460              | 70.3%                                                                | 88.2%                            | 70.6%                  | 80.0%                             | 25.1%              | 86.8%                                    | 70.2%                           | 0.4%                                | 16.6%                               | 87.2%                                       | 80.5%                                                     | 98.3%                                                       |
| Algeria                          | 2,448,776          | 2,317,420            | 131,356             | 4.1%                                                                 | 5.1%                             | 2.8%                   | 54.8%                             | 27.4%              | 3.0%                                     | 1.8%                            | 0.9%                                | 1.2%                                | 3.9%                                        | 69.8%                                                     | 95.4%                                                       |
| Greenland                        | 2,142,460          | 2,142,460            | -                   | 0.6%                                                                 | 16.6%                            | 0.0%                   | 0.0%                              |                    | 0.0%                                     |                                 |                                     |                                     | 0.0%                                        |                                                           |                                                             |
| Mexico                           | 5,168,872          | 1,966,228            | 3,202,644           | 29.0%                                                                | 81.1%                            | 49.1%                  | 60.6%                             | 16.6%              | 33.0%                                    | 24.3%                           | 24.5%                               | 8.7%                                | 57.5%                                       | 55.9%                                                     | 96.9%                                                       |
| Saudi Arabia                     | 2,155,684          | 1,930,412            | 225,272             | 7.5%                                                                 | 4.0%                             | 2.2%                   | 53.9%                             | 53.6%              | 0.0%                                     | 0.0%                            | 0.0%                                | 0.0%                                | 0.4%                                        | 51.4%                                                     | 96.9%                                                       |
| Indonesia                        | 7,952,676          | 1,892,408            | 6,060,268           | 37.1%                                                                | 63.1%                            | 33.0%                  | 52.2%                             | 38.3%              | 58.0%                                    | 27.9%                           | 3.3%                                | 30.1%                               | 61.3%                                       | 60.7%                                                     | 96.3%                                                       |
| Sudan                            | 1,950,240          | 1,867,248            | 82,992              | 20.2%                                                                | 26.7%                            | 18.6%                  | 69.4%                             | 57.1%              | 14.5%                                    | 12.0%                           | 6.5%                                | 2.5%                                | 21.0%                                       | 75.1%                                                     | 96.6%                                                       |
| Libya                            | 1,995,616          | 1,630,216            | 365,400             | 4.5%                                                                 | 2.6%                             | 0.8%                   | 32.6%                             | 20.9%              | 0.0%                                     | 0.0%                            | 0.2%                                | 0.0%                                | 0.2%                                        | 51.0%                                                     | 98.2%                                                       |
| Iran                             | 1,843,292          | 1,627,164            | 216,128             | 12.6%                                                                | 14.8%                            | 8.8%                   | 59.6%                             | 41.4%              | 11.1%                                    | 7.3%                            | 1.2%                                | 3.7%                                | 12.2%                                       | 59.6%                                                     | 97.1%                                                       |
| Mongolia                         | 1,563,920          | 1,563,920            | -                   | 29.7%                                                                | 49.4%                            | 29.7%                  | 60.2%                             |                    | 29.3%                                    | 20.1%                           | 9.6%                                | 9.2%                                | 38.9%                                       | 61.5%                                                     | 97.2%                                                       |
| Peru                             | 2,158,176          | 1,298,040            | 860,136             | 39.2%                                                                | 88.4%                            | 57.2%                  | 64.6%                             | 12.1%              | 75.3%                                    | 48.8%                           | 8.1%                                | 26.5%                               | 83.4%                                       | 61.2%                                                     | 97.0%                                                       |
| Chad                             | 1,273,508          | 1,273,508            | -                   | 21.5%                                                                | 31.2%                            | 21.5%                  | 68.8%                             |                    | 14.5%                                    | 12.2%                           | 9.3%                                | 2.3%                                | 23.8%                                       | 63.2%                                                     | 99.6%                                                       |
| Mali                             | 1,259,524          | 1,259,524            | -                   | 18.5%                                                                | 23.4%                            | 18.5%                  | 79.2%                             |                    | 4.1%                                     | 3.9%                            | 14.5%                               | 0.3%                                | 18.6%                                       | 73.4%                                                     | 98.2%                                                       |
| Angola                           | 1,750,540          | 1,251,856            | 498,684             | 51.7%                                                                | 91.7%                            | 65.9%                  | 71.9%                             | 16.2%              | 89.4%                                    | 64.8%                           | 1.0%                                | 24.6%                               | 90.3%                                       | 71.8%                                                     | 99.2%                                                       |
| South Africa                     | 2,774,500          | 1,224,140            | 1,550,360           | 31.5%                                                                | 84.8%                            | 59.3%                  | 69.9%                             | 9.5%               | 12.7%                                    | 9.4%                            | 49.8%                               | 3.3%                                | 62.5%                                       | 59.6%                                                     | 99.3%                                                       |
| Niger                            | 1,187,828          | 1,187,828            | -                   | 18.2%                                                                | 24.3%                            | 18.2%                  | 74.8%                             |                    | 0.1%                                     | 0.1%                            | 17.4%                               | 0.0%                                | 17.6%                                       | 70.7%                                                     | 99.1%                                                       |
| Colombia                         | 1,866,912          | 1,142,680            | 724,232             | 33.6%                                                                | 87.3%                            | 47.9%                  | 54.8%                             | 11.0%              | 85.5%                                    | 46.4%                           | 1.3%                                | 39.1%                               | 86.8%                                       | 67.9%                                                     | 96.2%                                                       |
| Ethiopia                         | 1,134,556          | 1,134,556            | -                   | 47.3%                                                                | 69.4%                            | 47.3%                  | 68.1%                             |                    | 61.5%                                    | 43.1%                           | 4.1%                                | 18.4%                               | 65.6%                                       | 61.9%                                                     | 97.7%                                                       |
| Bolivia                          | 1,092,884          | 1,092,884            | -                   | 60.5%                                                                | 84.6%                            | 60.5%                  | 71.6%                             |                    | 82.8%                                    | 60.4%                           | 0.1%                                | 22.4%                               | 82.9%                                       | 70.4%                                                     | 95.8%                                                       |
| Mauritania                       | 1,216,088          | 1,041,976            | 174,112             | 13.2%                                                                | 16.6%                            | 11.7%                  | 70.2%                             | 22.4%              | 0.0%                                     | 0.0%                            | 11.2%                               | 0.0%                                | 11.3%                                       | 71.7%                                                     | 97.4%                                                       |
| Egypt                            | 1,250,212          | 1,006,044            | 244,168             | 2.6%                                                                 | 3.2%                             | 0.7%                   | 22.3%                             | 10.4%              | 0.1%                                     | 0.1%                            | 0.2%                                | 0.0%                                | 0.3%                                        | 39.7%                                                     | 97.6%                                                       |
| United Republic of Tanzania      | 1,190,740          | 947,488              | 243,252             | 39.7%                                                                | 71.4%                            | 45.8%                  | 64.1%                             | 16.1%              | 63.2%                                    | 43.3%                           | 2.1%                                | 19.9%                               | 65.3%                                       | 67.4%                                                     | 96.6%                                                       |
| Venezuela                        | 1,395,436          | 918,704              | 476,732             | 50.2%                                                                | 83.9%                            | 60.3%                  | 71.8%                             | 30.7%              | 79.8%                                    | 57.1%                           | 3.0%                                | 22.7%                               | 82.8%                                       | 77.3%                                                     | 96.7%                                                       |
| Nigeria                          | 1,093,508          | 913,232              | 180,276             | 27.0%                                                                | 35.2%                            | 27.0%                  | 76.7%                             | 27.0%              | 31.3%                                    | 25.4%                           | 1.5%                                | 5.9%                                | 32.8%                                       | 77.6%                                                     | 95.4%                                                       |
| Pakistan                         | 1,101,288          | 875,924              | 225,364             | 21.0%                                                                | 38.2%                            | 20.7%                  | 54.3%                             | 22.2%              | 16.3%                                    | 12.7%                           | 7.7%                                | 3.5%                                | 23.9%                                       | 63.1%                                                     | 95.5%                                                       |
| Namibia                          | 1,391,648          | 826,760              | 564,888             | 46.2%                                                                | 78.1%                            | 56.5%                  | 72.3%                             | 31.2%              | 34.0%                                    | 25.3%                           | 31.1%                               | 8.7%                                | 65.0%                                       | 50.6%                                                     | 98.8%                                                       |
| Mozambique                       | 1,361,736          | 792,764              | 568,972             | 43.1%                                                                | 84.6%                            | 61.8%                  | 73.1%                             | 16.9%              | 72.9%                                    | 53.1%                           | 8.5%                                | 19.8%                               | 81.4%                                       | 72.0%                                                     | 96.1%                                                       |
| Turkey                           | 1,043,536          | 781,076              | 262,460             | 34.0%                                                                | 41.2%                            | 30.7%                  | 74.4%                             | 44.1%              | 36.4%                                    | 27.0%                           | 3.2%                                | 9.4%                                | 39.6%                                       | 67.2%                                                     | 93.2%                                                       |
| Zambia                           | 756,488            | 756,488              | -                   | 68.3%                                                                | 83.0%                            | 68.3%                  | 82.3%                             |                    | 81.7%                                    | 68.2%                           | 0.1%                                | 13.5%                               | 81.9%                                       | 80.9%                                                     | 97.3%                                                       |
| Chile                            | 4,414,404          | 737,852              | 3,676,552           | 9.5%                                                                 | 68.9%                            | 24.8%                  | 35.9%                             | 6.5%               | 36.7%                                    | 12.5%                           | 11.2%                               | 17.3%                               | 41.0%                                       | 52.2%                                                     | 96.2%                                                       |
| Myanmar                          | 1,166,872          | 666,444              | 500,428             | 46.7%                                                                | 65.6%                            | 48.6%                  | 74.1%                             | 44.1%              | 64.3%                                    | 47.4%                           | 0.6%                                | 16.9%                               | 64.8%                                       | 71.5%                                                     | 96.6%                                                       |
| Afghanistan                      | 643,804            | 643,804              | -                   | 27.7%                                                                | 48.4%                            | 27.7%                  | 57.2%                             |                    | 45.8%                                    | 27.3%                           | 0.3%                                | 18.6%                               | 46.2%                                       | 64.1%                                                     | 95.6%                                                       |
| France                           | 10,744,036         | 637,004              | 10,107,032          | 5.8%                                                                 | 52.2%                            | 33.6%                  | 64.5%                             | 4.0%               | 46.1%                                    | 28.4%                           | 4.0%                                | 17.7%                               | 50.1%                                       | 65.6%                                                     | 95.8%                                                       |
| South Sudan                      | 630,920            | 630,920              | -                   | 79.1%                                                                | 94.6%                            | 79.1%                  | 83.6%                             |                    | 94.6%                                    | 79.0%                           | 0.0%                                | 15.6%                               | 94.6%                                       | 88.4%                                                     | 98.9%                                                       |
| Central African Republic         | 622,068            | 622,068              | -                   | 80.8%                                                                | 97.9%                            | 80.8%                  | 82.5%                             |                    | 97.9%                                    | 80.8%                           | 0.0%                                | 17.1%                               | 97.9%                                       | 81.6%                                                     | 98.5%                                                       |

|                       |           |         |           |       |       |       |       |       |       |       |       |       |       |       |       |
|-----------------------|-----------|---------|-----------|-------|-------|-------|-------|-------|-------|-------|-------|-------|-------|-------|-------|
| Madagascar            | 1,842,036 | 596,124 | 1,245,912 | 32.4% | 84.9% | 65.0% | 76.6% | 16.8% | 64.4% | 48.5% | 15.9% | 16.0% | 80.4% | 69.8% | 95.6% |
| Morocco               | 874,924   | 593,764 | 281,160   | 22.0% | 22.5% | 16.0% | 71.2% | 34.6% | 7.2%  | 6.6%  | 8.3%  | 0.5%  | 15.4% | 69.2% | 97.7% |
| Kenya                 | 754,488   | 589,712 | 164,776   | 39.8% | 71.9% | 48.2% | 67.0% | 9.9%  | 65.8% | 46.2% | 1.8%  | 19.6% | 67.6% | 55.4% | 98.4% |
| Botswana              | 581,924   | 581,924 | -         | 54.2% | 92.4% | 54.2% | 58.6% |       | 56.7% | 29.5% | 24.7% | 27.2% | 81.4% | 47.9% | 98.7% |
| Ukraine               | 707,652   | 571,372 | 136,280   | 23.3% | 20.0% | 16.3% | 81.4% | 52.6% | 18.0% | 15.2% | 0.6%  | 2.8%  | 18.6% | 74.7% | 94.9% |
| Thailand              | 818,032   | 517,484 | 300,548   | 36.9% | 31.4% | 22.5% | 71.4% | 61.8% | 29.5% | 20.9% | 0.9%  | 8.6%  | 30.5% | 70.8% | 96.4% |
| Spain                 | 1,517,452 | 507,476 | 1,009,976 | 27.5% | 43.7% | 35.5% | 81.3% | 23.5% | 32.1% | 25.1% | 7.8%  | 6.9%  | 39.9% | 64.4% | 93.9% |
| Somalia               | 1,262,120 | 474,972 | 787,148   | 29.4% | 83.0% | 61.1% | 73.6% | 10.3% | 58.4% | 47.8% | 13.0% | 10.6% | 71.4% | 65.2% | 98.6% |
| Turkmenistan          | 532,768   | 471,460 | 61,308    | 10.4% | 21.0% | 11.8% | 56.2% | 0.1%  | 13.3% | 10.0% | 1.7%  | 3.3%  | 15.0% | 48.5% | 98.9% |
| Papua New Guinea      | 2,887,076 | 468,136 | 2,418,940 | 67.2% | 86.4% | 52.3% | 60.5% | 70.1% | 84.8% | 49.8% | 1.1%  | 34.8% | 85.7% | 72.5% | 96.2% |
| Cameroon              | 482,652   | 467,344 | 15,308    | 62.7% | 84.1% | 62.5% | 74.2% | 71.0% | 83.1% | 61.8% | 0.6%  | 21.3% | 83.7% | 56.0% | 95.8% |
| Yemen                 | 986,256   | 455,628 | 530,628   | 14.2% | 16.1% | 9.9%  | 61.5% | 17.8% | 0.0%  | 0.0%  | 7.2%  | 0.0%  | 7.3%  | 70.2% | 96.2% |
| Uzbekistan            | 448,200   | 448,200 | -         | 11.3% | 23.1% | 11.3% | 48.8% |       | 13.6% | 10.1% | 1.1%  | 3.5%  | 14.7% | 58.3% | 97.9% |
| Sweden                | 600,012   | 444,624 | 155,388   | 43.6% | 89.9% | 33.0% | 36.7% | 73.7% | 78.6% | 30.9% | 1.4%  | 47.7% | 80.0% | 64.5% | 96.5% |
| Iraq                  | 439,772   | 438,576 | 1,196     | 1.8%  | 3.0%  | 1.5%  | 51.5% | 84.3% | 1.1%  | 0.9%  | 0.3%  | 0.2%  | 1.4%  | 62.9% | 94.9% |
| Paraguay              | 401,704   | 401,704 | -         | 62.6% | 77.1% | 62.6% | 81.2% |       | 76.6% | 62.4% | 0.2%  | 14.2% | 76.8% | 80.8% | 99.8% |
| Zimbabwe              | 391,384   | 391,384 | -         | 49.6% | 62.3% | 49.6% | 79.5% |       | 61.3% | 49.2% | 0.3%  | 12.1% | 61.6% | 77.1% | 93.9% |
| Norway                | 2,391,520 | 380,476 | 2,011,044 | 42.5% | 74.7% | 25.7% | 34.4% | 45.7% | 37.3% | 19.7% | 3.7%  | 17.2% | 40.6% | 42.4% | 96.7% |
| Japan                 | 4,669,500 | 374,096 | 4,295,404 | 17.3% | 68.1% | 48.3% | 71.0% | 14.6% | 26.2% | 16.6% | 29.5% | 9.6%  | 55.7% | 65.1% | 96.6% |
| Germany               | 413,740   | 357,144 | 56,596    | 43.5% | 46.9% | 38.3% | 81.7% | 76.0% | 46.3% | 37.7% | 0.3%  | 8.6%  | 46.6% | 77.8% | 96.4% |
| Republic of the Congo | 381,200   | 347,180 | 34,020    | 64.9% | 89.9% | 68.3% | 76.0% | 30.4% | 89.2% | 68.0% | 0.2%  | 21.2% | 89.4% | 77.9% | 99.0% |
| Finland               | 412,496   | 331,656 | 80,840    | 48.4% | 90.9% | 41.4% | 45.5% | 77.2% | 83.6% | 38.8% | 1.9%  | 44.7% | 85.5% | 50.9% | 97.7% |
| Vietnam               | 1,086,328 | 330,732 | 755,596   | 41.2% | 50.5% | 38.8% | 76.9% | 42.2% | 42.7% | 32.6% | 5.0%  | 10.1% | 47.7% | 71.0% | 97.3% |
| Malaysia              | 844,336   | 330,060 | 514,276   | 60.2% | 65.7% | 44.6% | 67.8% | 70.3% | 56.5% | 36.3% | 4.8%  | 20.2% | 61.2% | 66.9% | 98.2% |
| Ivory Coast           | 495,728   | 322,812 | 172,916   | 27.9% | 47.4% | 37.3% | 78.6% | 10.3% | 46.8% | 36.9% | 0.3%  | 10.0% | 47.2% | 75.8% | 96.0% |
| Poland                | 342,868   | 312,896 | 29,972    | 36.8% | 39.1% | 32.3% | 82.5% | 84.2% | 38.3% | 31.5% | 0.5%  | 6.8%  | 38.9% | 73.8% | 94.9% |
| Oman                  | 872,260   | 312,840 | 559,420   | 11.4% | 6.1%  | 4.0%  | 65.4% | 15.6% | 0.0%  | 0.0%  | 0.6%  | 0.0%  | 0.6%  | 48.4% | 97.7% |
| Italy                 | 838,760   | 301,348 | 537,412   | 38.1% | 39.7% | 31.7% | 79.9% | 41.7% | 33.0% | 25.8% | 5.0%  | 7.2%  | 38.0% | 67.4% | 94.8% |
| Philippines           | 2,277,832 | 295,028 | 1,982,804 | 30.0% | 35.8% | 27.2% | 76.1% | 30.4% | 25.4% | 15.7% | 6.7%  | 9.7%  | 32.1% | 65.1% | 96.8% |
| Burkina Faso          | 274,488   | 274,488 | -         | 22.6% | 27.7% | 22.6% | 81.6% |       | 5.7%  | 4.7%  | 17.8% | 1.0%  | 23.5% | 83.6% | 97.0% |
| New Zealand           | 6,105,660 | 268,704 | 5,836,956 | 9.1%  | 89.9% | 60.5% | 67.3% | 6.7%  | 62.9% | 37.0% | 21.4% | 22.0% | 80.4% | 45.8% | 98.3% |
| Gabon                 | 464,852   | 261,768 | 203,084   | 45.8% | 94.7% | 66.1% | 69.7% | 19.7% | 93.9% | 65.6% | 0.3%  | 28.2% | 94.1% | 76.8% | 98.5% |
| Ecuador               | 1,351,112 | 256,720 | 1,094,392 | 16.3% | 81.8% | 49.4% | 60.5% | 8.5%  | 76.3% | 45.4% | 3.5%  | 30.9% | 79.8% | 71.9% | 98.6% |
| Guinea                | 348,736   | 245,884 | 102,852   | 52.1% | 76.7% | 63.4% | 82.6% | 25.2% | 63.0% | 52.5% | 10.8% | 10.5% | 73.8% | 77.5% | 97.5% |
| Uganda                | 243,632   | 243,632 | -         | 31.9% | 50.7% | 31.9% | 62.9% |       | 36.2% | 30.5% | 0.7%  | 5.7%  | 36.9% | 78.3% | 96.9% |
| United Kingdom        | 6,127,288 | 243,144 | 5,884,144 | 13.2% | 63.6% | 47.9% | 75.3% | 11.7% | 51.6% | 40.7% | 5.1%  | 10.9% | 56.7% | 74.1% | 98.4% |
| Ghana                 | 469,140   | 240,176 | 228,964   | 31.0% | 51.6% | 43.1% | 83.4% | 18.3% | 43.8% | 36.9% | 5.6%  | 6.9%  | 49.5% | 77.6% | 97.6% |
| Romania               | 265,976   | 236,388 | 29,588    | 35.8% | 42.4% | 35.2% | 82.8% | 40.6% | 41.0% | 34.4% | 0.6%  | 6.5%  | 41.6% | 76.8% | 96.0% |
| Laos                  | 229,312   | 229,312 | -         | 68.5% | 81.4% | 68.5% | 84.2% |       | 80.4% | 67.7% | 0.7%  | 12.6% | 81.1% | 79.7% | 96.5% |
| Guyana                | 352,220   | 212,656 | 139,564   | 34.3% | 98.2% | 40.7% | 41.5% | 24.4% | 97.9% | 40.3% | 0.2%  | 57.6% | 98.1% | 52.7% | 94.7% |
| Belarus               | 207,080   | 207,080 | -         | 38.3% | 46.3% | 38.3% | 82.8% |       | 45.9% | 38.1% | 0.2%  | 7.8%  | 46.2% | 79.4% | 95.5% |
| Kyrgyzstan            | 199,084   | 199,084 | -         | 43.0% | 62.5% | 43.0% | 68.8% |       | 55.3% | 41.5% | 1.2%  | 13.8% | 56.5% | 69.3% | 94.8% |
| Senegal               | 356,688   | 197,232 | 159,456   | 38.9% | 67.4% | 53.1% | 78.8% | 21.2% | 4.3%  | 3.1%  | 49.7% | 1.1%  | 53.9% | 68.2% | 95.9% |
| Syria                 | 196,616   | 186,328 | 10,288    | 5.7%  | 6.5%  | 3.8%  | 59.5% | 38.4% | 2.8%  | 1.9%  | 0.8%  | 0.9%  | 3.6%  | 63.9% | 94.2% |
| Cambodia              | 231,168   | 182,144 | 49,024    | 45.2% | 55.5% | 41.8% | 75.3% | 57.9% | 45.3% | 34.0% | 7.4%  | 11.2% | 52.7% | 82.7% | 97.6% |
| Uruguay               | 321,248   | 177,824 | 143,424   | 49.8% | 79.7% | 67.0% | 84.0% | 28.5% | 6.5%  | 5.6%  | 61.1% | 0.9%  | 67.6% | 74.7% | 97.0% |
| Somaliiland           | 168,536   | 168,536 | -         | 51.4% | 76.2% | 51.4% | 67.4% |       | 7.4%  | 6.2%  | 44.5% | 1.2%  | 51.9% | 74.7% | 98.0% |
| Tunisia               | 256,980   | 157,060 | 99,920    | 35.5% | 11.9% | 8.1%  | 67.9% | 78.8% | 3.5%  | 3.1%  | 3.4%  | 0.4%  | 6.9%  | 55.3% | 97.1% |
| Nepal                 | 147,612   | 147,612 | -         | 51.7% | 65.4% | 51.7% | 79.1% |       | 65.2% | 51.6% | 0.1%  | 13.6% | 65.3% | 78.4% | 98.3% |
| Suriname              | 280,288   | 146,080 | 134,208   | 36.2% | 99.2% | 42.2% | 42.5% | 29.6% | 97.9% | 41.5% | 0.6%  | 56.3% | 98.4% | 80.1% | 97.9% |
| Tajikistan            | 142,464   | 142,464 | -         | 33.6% | 53.7% | 33.6% | 62.6% |       | 36.4% | 31.1% | 2.2%  | 5.2%  | 38.6% | 68.8% | 97.8% |
| Bangladesh            | 250,524   | 137,544 | 112,980   | 30.0% | 23.4% | 17.8% | 75.9% | 44.9% | 15.9% | 11.6% | 2.6%  | 4.4%  | 18.5% | 60.1% | 97.0% |
| Greece                | 615,444   | 131,648 | 483,796   | 36.9% | 54.4% | 44.6% | 82.0% | 34.8% | 41.7% | 33.9% | 8.9%  | 7.8%  | 50.5% | 65.7% | 95.2% |
| Nicaragua             | 344,648   | 129,436 | 215,212   | 39.3% | 67.1% | 43.4% | 64.7% | 36.8% | 38.5% | 23.7% | 18.7% | 14.8% | 57.2% | 64.7% | 96.2% |
| Eritrea               | 202,040   | 123,240 | 78,800    | 34.3% | 38.5% | 23.0% | 59.9% | 52.0% | 11.8% | 10.7% | 12.0% | 1.0%  | 23.7% | 79.6% | 96.3% |

|                        |           |         |           |       |       |       |        |        |       |       |       |       |       |       |        |
|------------------------|-----------|---------|-----------|-------|-------|-------|--------|--------|-------|-------|-------|-------|-------|-------|--------|
| North Korea            | 237,080   | 122,588 | 114,492   | 40.7% | 64.1% | 48.8% | 76.2%  | 32.0%  | 25.8% | 19.0% | 28.9% | 6.7%  | 54.6% | 70.9% | 94.7%  |
| Malawi                 | 120,160   | 120,160 | -         | 25.1% | 47.7% | 25.1% | 52.6%  |        | 17.3% | 14.0% | 9.8%  | 3.3%  | 27.1% | 80.1% | 96.8%  |
| Benin                  | 152,516   | 116,756 | 35,760    | 37.5% | 57.8% | 45.6% | 78.7%  | 11.1%  | 49.6% | 40.5% | 4.8%  | 9.1%  | 54.4% | 79.1% | 96.4%  |
| Honduras               | 324,760   | 112,912 | 211,848   | 41.4% | 76.1% | 51.4% | 67.6%  | 36.1%  | 52.4% | 31.5% | 19.5% | 20.9% | 71.8% | 60.8% | 95.9%  |
| Bulgaria               | 147,612   | 112,852 | 34,760    | 31.7% | 41.2% | 32.2% | 78.1%  | 30.3%  | 40.0% | 31.5% | 0.6%  | 8.5%  | 40.6% | 69.9% | 93.8%  |
| Cuba                   | 464,372   | 110,404 | 353,968   | 34.2% | 50.5% | 38.4% | 76.0%  | 32.9%  | 18.2% | 11.5% | 25.3% | 6.5%  | 43.3% | 55.1% | 95.5%  |
| Guatemala              | 220,676   | 109,388 | 111,288   | 30.0% | 71.8% | 49.3% | 68.7%  | 11.1%  | 55.7% | 36.6% | 12.6% | 19.2% | 68.3% | 71.4% | 96.4%  |
| Iceland                | 861,860   | 102,000 | 759,860   | 39.1% | 68.3% | 21.7% | 31.7%  | 41.4%  | 0.0%  | 0.0%  | 16.4% | 0.0%  | 16.4% | 27.9% | 96.5%  |
| South Korea            | 530,172   | 98,696  | 431,476   | 56.6% | 51.2% | 39.3% | 76.8%  | 60.6%  | 11.0% | 7.3%  | 30.3% | 3.6%  | 41.3% | 59.4% | 96.5%  |
| Liberia                | 349,380   | 95,896  | 253,484   | 13.7% | 46.0% | 30.8% | 67.1%  | 7.2%   | 45.3% | 30.0% | 0.6%  | 15.2% | 45.8% | 79.3% | 97.3%  |
| Hungary                | 93,076    | 93,076  | -         | 22.9% | 27.6% | 22.9% | 82.8%  |        | 26.4% | 22.2% | 0.5%  | 4.2%  | 26.9% | 74.3% | 97.2%  |
| Portugal               | 1,823,500 | 91,544  | 1,731,956 | 10.3% | 43.5% | 37.2% | 85.5%  | 8.9%   | 24.7% | 21.1% | 7.9%  | 3.6%  | 32.6% | 64.8% | 95.3%  |
| Western Sahara         | 90,700    | 90,700  | -         | 0.0%  | 0.0%  | 0.0%  | 100.0% |        | 0.0%  | 0.0%  | 0.0%  | 0.0%  | 0.0%  | 20.0% | 100.0% |
| Jordan                 | 89,236    | 89,140  | 96        | 1.5%  | 2.4%  | 1.5%  | 60.9%  | 83.3%  | 0.8%  | 0.7%  | 0.0%  | 0.1%  | 0.8%  | 60.8% | 95.1%  |
| Azerbaijan             | 167,012   | 86,320  | 80,692    | 13.2% | 34.1% | 25.5% | 74.7%  | 0.2%   | 25.7% | 21.7% | 2.7%  | 4.0%  | 28.4% | 68.1% | 95.4%  |
| Austria                | 83,992    | 83,992  | -         | 59.2% | 71.4% | 59.2% | 82.9%  |        | 71.2% | 59.1% | 0.1%  | 12.1% | 71.2% | 81.8% | 95.3%  |
| Czechia                | 78,736    | 78,736  | -         | 39.0% | 45.7% | 39.0% | 85.4%  |        | 45.4% | 38.8% | 0.1%  | 6.6%  | 45.6% | 76.2% | 97.1%  |
| Republic of Serbia     | 77,532    | 77,532  | -         | 35.1% | 41.0% | 35.1% | 85.6%  |        | 40.5% | 34.6% | 0.4%  | 5.9%  | 40.9% | 78.7% | 95.6%  |
| Panama                 | 407,864   | 74,964  | 332,900   | 20.3% | 67.2% | 44.2% | 65.8%  | 14.9%  | 59.5% | 37.5% | 5.9%  | 21.6% | 65.0% | 69.0% | 96.9%  |
| Sierra Leone           | 233,772   | 72,084  | 161,688   | 15.2% | 32.1% | 26.0% | 81.0%  | 10.3%  | 23.2% | 18.0% | 7.7%  | 5.2%  | 30.9% | 79.0% | 94.9%  |
| United Arab Emirates   | 129,352   | 71,384  | 57,968    | 35.6% | 4.7%  | 4.0%  | 84.8%  | 74.6%  | 0.0%  | 0.0%  | 0.3%  | 0.0%  | 0.3%  | 61.5% | 98.2%  |
| Georgia                | 92,524    | 69,564  | 22,960    | 43.8% | 60.7% | 41.8% | 68.9%  | 49.8%  | 60.6% | 41.4% | 0.1%  | 19.1% | 60.6% | 64.0% | 95.5%  |
| Ireland                | 495,468   | 69,244  | 426,224   | 46.0% | 90.0% | 73.8% | 82.0%  | 41.4%  | 75.1% | 65.0% | 6.6%  | 10.2% | 81.7% | 81.1% | 98.0%  |
| Sri Lanka              | 603,828   | 66,740  | 537,088   | 13.0% | 49.2% | 39.5% | 80.2%  | 9.7%   | 32.5% | 25.3% | 12.3% | 7.2%  | 44.8% | 62.2% | 97.6%  |
| Lithuania              | 71,656    | 64,796  | 6,860     | 40.5% | 41.5% | 35.6% | 85.6%  | 87.3%  | 41.0% | 35.0% | 0.4%  | 6.0%  | 41.4% | 75.9% | 94.3%  |
| Latvia                 | 92,552    | 64,364  | 28,188    | 66.4% | 69.2% | 58.0% | 83.7%  | 85.8%  | 66.4% | 55.5% | 2.1%  | 10.9% | 68.5% | 62.6% | 95.9%  |
| Togo                   | 72,892    | 57,348  | 15,544    | 35.9% | 49.8% | 42.3% | 84.9%  | 12.4%  | 45.2% | 38.6% | 3.5%  | 6.6%  | 48.7% | 77.5% | 95.4%  |
| Croatia                | 110,564   | 55,028  | 55,536    | 60.8% | 54.3% | 43.3% | 79.7%  | 78.1%  | 48.6% | 37.8% | 4.1%  | 10.8% | 52.7% | 63.9% | 94.6%  |
| Bosnia and Herzegovina | 51,832    | 51,820  | 12        | 57.2% | 69.8% | 57.1% | 81.9%  | 100.0% | 68.7% | 56.5% | 0.6%  | 12.2% | 69.3% | 74.0% | 94.4%  |
| Costa Rica             | 637,336   | 51,480  | 585,856   | 14.0% | 71.9% | 55.5% | 77.2%  | 10.4%  | 52.7% | 39.1% | 15.6% | 13.6% | 68.3% | 66.1% | 95.2%  |
| Dominican Republic     | 401,300   | 48,768  | 352,532   | 14.4% | 64.7% | 49.0% | 75.7%  | 9.6%   | 33.6% | 22.9% | 25.1% | 10.7% | 58.8% | 63.9% | 95.5%  |
| Slovakia               | 48,488    | 48,488  | -         | 44.6% | 52.3% | 44.6% | 85.3%  |        | 52.1% | 44.5% | 0.1%  | 7.6%  | 52.2% | 81.2% | 96.0%  |
| Estonia                | 82,040    | 45,732  | 36,308    | 68.7% | 72.7% | 57.9% | 79.6%  | 82.3%  | 58.7% | 47.4% | 9.0%  | 11.3% | 67.7% | 66.0% | 96.8%  |
| Denmark                | 2,670,696 | 42,528  | 2,628,168 | 31.3% | 21.7% | 20.7% | 95.2%  | 31.5%  | 6.4%  | 5.4%  | 6.7%  | 1.0%  | 13.1% | 65.2% | 97.7%  |
| Switzerland            | 41,392    | 41,392  | -         | 56.8% | 71.7% | 56.8% | 79.2%  |        | 70.1% | 56.3% | 0.1%  | 13.7% | 70.2% | 78.8% | 95.7%  |
| Bhutan                 | 40,488    | 40,488  | -         | 70.9% | 91.6% | 70.9% | 77.4%  |        | 91.6% | 70.9% | 0.0%  | 20.7% | 91.6% | 74.9% | 97.5%  |
| Netherlands            | 182,376   | 37,300  | 145,076   | 40.2% | 46.5% | 45.1% | 97.0%  | 39.0%  | 43.1% | 36.9% | 2.2%  | 6.2%  | 45.3% | 67.6% | 97.1%  |
| Taiwan                 | 467,724   | 36,420  | 431,304   | 21.9% | 62.4% | 39.7% | 63.6%  | 20.4%  | 23.3% | 9.6%  | 29.0% | 13.8% | 52.3% | 65.1% | 97.3%  |
| Moldova                | 33,204    | 33,204  | -         | 7.0%  | 8.9%  | 7.0%  | 79.5%  |        | 8.0%  | 6.4%  | 0.5%  | 1.5%  | 8.4%  | 71.4% | 94.7%  |
| Guinea-Bissau          | 140,552   | 33,048  | 107,504   | 29.1% | 73.4% | 56.8% | 77.3%  | 20.5%  | 38.4% | 25.5% | 29.9% | 12.9% | 68.3% | 68.7% | 96.8%  |
| Belgium                | 34,128    | 30,636  | 3,492     | 37.4% | 37.7% | 32.3% | 85.7%  | 82.6%  | 35.8% | 30.4% | 1.3%  | 5.3%  | 37.0% | 81.2% | 95.1%  |
| Lesotho                | 30,232    | 30,232  | -         | 63.5% | 73.7% | 63.5% | 86.2%  |        | 4.1%  | 4.0%  | 59.6% | 0.1%  | 63.7% | 84.3% | 98.5%  |
| Armenia                | 29,644    | 29,644  | -         | 28.9% | 39.3% | 28.9% | 73.5%  |        | 35.9% | 28.6% | 0.1%  | 7.3%  | 36.0% | 61.4% | 95.6%  |
| Albania                | 40,520    | 28,352  | 12,168    | 49.2% | 46.7% | 38.6% | 82.6%  | 74.0%  | 41.1% | 33.7% | 4.2%  | 7.4%  | 45.3% | 74.7% | 94.3%  |
| Solomon Islands        | 1,643,080 | 27,356  | 1,615,724 | 48.2% | 91.7% | 49.5% | 54.0%  | 48.2%  | 83.0% | 42.2% | 1.9%  | 40.7% | 84.8% | 63.6% | 97.1%  |
| Burundi                | 27,196    | 27,196  | -         | 30.6% | 42.0% | 30.6% | 72.8%  |        | 32.5% | 28.4% | 1.7%  | 4.1%  | 34.3% | 78.5% | 97.1%  |
| Haiti                  | 145,048   | 27,016  | 118,032   | 28.0% | 78.4% | 65.4% | 83.4%  | 19.4%  | 22.1% | 16.7% | 47.1% | 5.4%  | 69.2% | 73.5% | 97.1%  |
| Equatorial Guinea      | 333,112   | 26,864  | 306,248   | 8.2%  | 89.1% | 71.8% | 80.6%  | 2.6%   | 89.0% | 71.1% | 0.0%  | 17.9% | 89.1% | 81.0% | 97.7%  |
| Rwanda                 | 25,512    | 25,512  | -         | 22.2% | 30.5% | 22.2% | 72.8%  |        | 23.4% | 19.7% | 2.3%  | 3.7%  | 25.8% | 75.3% | 94.1%  |
| Macedonia              | 25,380    | 25,380  | -         | 46.9% | 59.6% | 46.9% | 78.8%  |        | 58.0% | 46.6% | 0.2%  | 11.3% | 58.1% | 74.8% | 94.3%  |
| Belize                 | 56,948    | 22,472  | 34,476    | 55.2% | 86.3% | 60.2% | 69.8%  | 51.9%  | 79.7% | 54.2% | 4.6%  | 25.4% | 84.2% | 59.3% | 96.2%  |
| Djibouti               | 29,252    | 21,988  | 7,264     | 24.0% | 12.0% | 6.4%  | 53.1%  | 77.3%  | 2.7%  | 1.7%  | 3.6%  | 1.0%  | 6.3%  | 49.1% | 91.4%  |
| Israel                 | 46,672    | 21,960  | 24,712    | 16.7% | 8.8%  | 6.0%  | 68.5%  | 26.1%  | 3.4%  | 2.8%  | 1.5%  | 0.5%  | 4.8%  | 66.0% | 94.9%  |
| El Salvador            | 116,360   | 20,664  | 95,696    | 27.6% | 73.9% | 61.8% | 83.7%  | 20.2%  | 16.0% | 12.3% | 48.8% | 3.6%  | 64.8% | 71.4% | 92.8%  |
| Slovenia               | 20,516    | 20,316  | 200       | 57.6% | 70.9% | 57.3% | 80.8%  | 90.0%  | 70.8% | 57.1% | 0.0%  | 13.7% | 70.8% | 78.3% | 95.6%  |

|                                   |           |        |           |       |       |       |        |       |       |       |       |       |       |       |        |
|-----------------------------------|-----------|--------|-----------|-------|-------|-------|--------|-------|-------|-------|-------|-------|-------|-------|--------|
| New Caledonia                     | 18,956    | 18,956 | -         | 38.3% | 75.9% | 38.3% | 50.4%  |       | 13.4% | 4.7%  | 32.7% | 8.6%  | 46.0% | 4.1%  | 94.9%  |
| Fiji                              | 1,300,116 | 18,944 | 1,281,172 | 11.3% | 64.2% | 60.8% | 94.8%  | 10.5% | 16.3% | 13.5% | 35.8% | 2.8%  | 52.0% | 58.8% | 97.3%  |
| Kuwait                            | 28,772    | 17,536 | 11,236    | 28.9% | 1.2%  | 1.2%  | 100.0% | 72.2% | 0.0%  | 0.0%  | 0.2%  | 0.0%  | 0.2%  | 43.6% | 94.5%  |
| eSwatini                          | 17,196    | 17,196 | -         | 52.8% | 61.6% | 52.8% | 85.8%  |       | 45.8% | 39.8% | 13.0% | 6.0%  | 58.8% | 80.7% | 96.0%  |
| East Timor                        | 93,164    | 15,184 | 77,980    | 20.9% | 15.7% | 12.0% | 76.2%  | 22.7% | 12.7% | 8.2%  | 2.3%  | 4.5%  | 15.0% | 66.3% | 95.6%  |
| Montenegro                        | 20,144    | 13,764 | 6,380     | 61.5% | 81.4% | 64.5% | 79.2%  | 55.2% | 80.6% | 63.5% | 0.2%  | 17.1% | 80.8% | 75.0% | 93.2%  |
| The Bahamas                       | 635,316   | 12,652 | 622,664   | 40.3% | 85.5% | 53.2% | 62.2%  | 40.0% | 51.7% | 27.6% | 16.0% | 19.7% | 63.3% | 35.0% | 97.1%  |
| Vanuatu                           | 639,236   | 12,332 | 626,904   | 19.1% | 86.2% | 48.4% | 56.1%  | 18.5% | 65.4% | 30.8% | 11.1% | 34.3% | 76.2% | 48.3% | 94.6%  |
| Falkland Islands                  | 11,488    | 11,488 | -         | 6.3%  | 0.0%  | 0.0%  | 0.0%   |       | 0.0%  | 0.0%  | 0.0%  | 0.0%  | 0.0%  | 0.0%  | 100.0% |
| Qatar                             | 42,848    | 11,220 | 31,628    | 32.7% | 1.8%  | 1.8%  | 100.0% | 43.5% | 0.0%  | 0.0%  | 0.3%  | 0.0%  | 0.3%  | 29.2% | 98.5%  |
| Jamaica                           | 284,904   | 11,056 | 273,848   | 16.1% | 78.3% | 63.7% | 81.4%  | 14.1% | 43.2% | 32.8% | 28.9% | 10.4% | 72.1% | 66.0% | 94.8%  |
| Kosovo                            | 10,928    | 10,928 | -         | 35.9% | 48.8% | 35.9% | 73.6%  |       | 48.8% | 35.9% | 0.0%  | 12.9% | 48.8% | 74.1% | 92.0%  |
| Gambia                            | 33,912    | 10,672 | 23,240    | 28.2% | 32.6% | 26.9% | 82.7%  | 28.8% | 11.5% | 8.0%  | 17.2% | 3.4%  | 28.7% | 78.4% | 94.4%  |
| Lebanon                           | 30,268    | 10,044 | 20,224    | 27.4% | 32.4% | 28.7% | 88.6%  | 26.7% | 4.4%  | 3.8%  | 16.8% | 0.6%  | 21.2% | 60.4% | 90.4%  |
| Puerto Rico                       | 9,052     | 9,052  | -         | 69.9% | 72.2% | 69.9% | 96.8%  |       | 41.9% | 37.0% | 28.8% | 4.8%  | 70.6% | 52.8% | 99.1%  |
| French Southern and Antarctic Lan | 7,284     | 7,284  | -         | 1.2%  | 0.0%  | 0.0%  | 0.0%   |       | 0.0%  | 0.0%  | 0.0%  | 0.0%  | 0.0%  | 0.0%  | 100.0% |
| Palestine                         | 6,292     | 6,292  | -         | 22.1% | 28.2% | 22.1% | 78.4%  |       | 14.0% | 11.2% | 4.6%  | 2.8%  | 18.6% | 74.7% | 96.0%  |
| Brunei                            | 49,132    | 5,752  | 43,380    | 30.8% | 86.5% | 67.0% | 77.4%  | 26.0% | 85.3% | 65.0% | 0.3%  | 20.3% | 85.7% | 64.9% | 95.5%  |
| Cyprus                            | 104,100   | 5,420  | 98,680    | 23.2% | 48.8% | 45.4% | 93.0%  | 22.0% | 6.6%  | 5.6%  | 32.8% | 1.0%  | 39.5% | 65.4% | 93.2%  |
| Trinidad and Tobago               | 82,164    | 5,144  | 77,020    | 34.8% | 73.3% | 58.0% | 79.2%  | 33.3% | 69.4% | 50.9% | 3.4%  | 18.6% | 72.9% | 68.8% | 96.4%  |
| South Georgia and the Islands     | 3,908     | 3,908  | -         | 0.2%  | 0.0%  | 0.0%  | 0.0%   |       | 0.0%  | 0.0%  | 0.0%  | 0.0%  | 0.0%  | 0.0%  | 100.0% |
| Cabo Verde                        | 810,336   | 3,888  | 806,448   | 62.8% | 0.0%  | 0.0%  | 0.0%   | 63.1% | 0.0%  | 0.0%  | 0.0%  | 0.0%  | 0.0%  | 5.0%  | 100.0% |
| French Polynesia                  | 3,428     | 3,428  | -         | 19.3% | 0.0%  | 0.0%  | 0.0%   |       | 0.0%  | 0.0%  | 0.0%  | 0.0%  | 0.0%  | 30.3% | 89.1%  |
| Northern Cyprus                   | 3,340     | 3,340  | -         | 31.1% | 37.5% | 31.1% | 83.1%  |       | 1.2%  | 0.8%  | 13.4% | 0.4%  | 14.6% | 56.9% | 93.8%  |
| Samoa                             | 134,052   | 2,776  | 131,276   | 12.4% | 0.0%  | 0.0%  | 0.0%   | 12.4% | 0.0%  | 0.0%  | 0.0%  | 0.0%  | 0.0%  | 39.1% | 90.6%  |
| Luxembourg                        | 2,620     | 2,620  | -         | 49.9% | 57.1% | 49.9% | 87.4%  |       | 57.1% | 49.9% | 0.0%  | 7.2%  | 57.1% | 80.1% | 95.1%  |
| Siachen Glacier                   | 2,064     | 2,064  | -         | 0.0%  | 10.1% | 0.0%  | 0.0%   |       | 1.0%  | 0.0%  | 0.0%  | 1.0%  | 1.0%  | #N/A  | #N/A   |
| Mauritius                         | 1,942,436 | 2,012  | 1,940,424 | 13.9% | 0.0%  | 0.0%  | 0.0%   | 13.9% | 0.0%  | 0.0%  | 0.0%  | 0.0%  | 0.0%  | 38.3% | 97.9%  |
| Comoros                           | 167,140   | 1,640  | 165,500   | 10.3% | 0.0%  | 0.0%  | 0.0%   | 10.2% | 0.0%  | 0.0%  | 0.0%  | 0.0%  | 0.0%  | 35.2% | 100.0% |
| Faroe Islands                     | 1,328     | 1,328  | -         | 35.8% | 74.1% | 35.8% | 48.4%  |       | 0.0%  | 0.0%  | 3.3%  | 0.0%  | 3.3%  | 5.0%  | 97.5%  |
| Hong Kong S.A.R.                  | 1,048     | 1,048  | -         | 51.5% | 51.5% | 51.5% | 100.0% |       | 5.0%  | 2.7%  | 35.5% | 2.3%  | 40.5% | 17.0% | 94.1%  |
| São Tomé and Príncipe             | 167,496   | 1,032  | 166,464   | 28.0% | 0.0%  | 0.0%  | 0.0%   | 28.1% | 0.0%  | 0.0%  | 0.0%  | 0.0%  | 0.0%  | 0.0%  | 100.0% |
| Kiribati                          | 3,462,532 | 988    | 3,461,544 | 38.9% | 0.0%  | 0.0%  | 0.0%   | 38.9% | 0.0%  | 0.0%  | 0.0%  | 0.0%  | 0.0%  | 23.3% | 99.2%  |
| Aland                             | 920       | 920    | -         | 44.8% | 73.9% | 44.8% | 60.6%  |       | 8.7%  | 5.7%  | 31.3% | 3.0%  | 40.0% | 42.7% | 94.2%  |
| Dominica                          | 29,480    | 744    | 28,736    | 29.1% | 94.6% | 87.6% | 92.6%  | 27.6% | 91.9% | 81.7% | 2.7%  | 10.2% | 94.6% | 55.8% | 86.5%  |
| Federated States of Micronesia    | 3,030,868 | 624    | 3,030,244 | 72.4% | 0.0%  | 0.0%  | 0.0%   | 72.4% | 0.0%  | 0.0%  | 0.0%  | 0.0%  | 0.0%  | 13.0% | 95.7%  |
| Saint Lucia                       | 16,124    | 624    | 15,500    | 46.1% | 84.6% | 69.2% | 81.8%  | 45.2% | 82.1% | 60.3% | 2.6%  | 21.8% | 84.6% | 56.5% | 87.0%  |
| Bahrain                           | 8,140     | 596    | 7,544     | 76.1% | 5.4%  | 5.4%  | 100.0% | 80.4% | 0.7%  | 0.7%  | 0.7%  | 0.0%  | 1.3%  | 56.3% | 81.3%  |
| Tonga                             | 670,056   | 592    | 669,464   | 8.2%  | 0.0%  | 0.0%  | 0.0%   | 8.2%  | 0.0%  | 0.0%  | 0.0%  | 0.0%  | 0.0%  | 31.6% | 96.5%  |
| Isle of Man                       | 580       | 580    | -         | 46.2% | 79.3% | 46.2% | 58.3%  |       | 77.9% | 42.8% | 1.4%  | 35.2% | 79.3% | 76.1% | 91.0%  |
| Northern Mariana Islands          | 580       | 580    | -         | 21.4% | 0.0%  | 0.0%  | 0.0%   |       | 0.0%  | 0.0%  | 0.0%  | 0.0%  | 0.0%  | 32.3% | 96.8%  |
| Guam                              | 560       | 560    | -         | 30.7% | 0.0%  | 0.0%  | 0.0%   |       | 0.0%  | 0.0%  | 0.0%  | 0.0%  | 0.0%  | 27.9% | 100.0% |
| Singapore                         | 1,216     | 520    | 696       | 59.2% | 13.1% | 13.1% | 100.0% | 90.2% | 9.2%  | 8.5%  | 3.8%  | 0.8%  | 13.1% | 47.8% | 100.0% |
| Palau                             | 619,300   | 500    | 618,800   | 63.2% | 0.0%  | 0.0%  | 0.0%   | 63.2% | 0.0%  | 0.0%  | 0.0%  | 0.0%  | 0.0%  | 43.6% | 100.0% |
| Antigua and Barbuda               | 112,620   | 464    | 112,156   | 13.4% | 78.4% | 78.4% | 100.0% | 13.1% | 18.1% | 10.3% | 55.2% | 7.8%  | 73.3% | 69.2% | 94.5%  |
| Curaçao                           | 456       | 456    | -         | 50.9% | 78.1% | 50.9% | 65.2%  |       | 5.3%  | 3.5%  | 36.8% | 1.8%  | 42.1% | 13.8% | 91.4%  |
| Andorra                           | 448       | 448    | -         | 82.1% | 93.8% | 82.1% | 87.6%  |       | 93.8% | 82.1% | 0.0%  | 11.6% | 93.8% | 71.7% | 92.4%  |
| Seychelles                        | 1,350,692 | 436    | 1,350,256 | 19.6% | 0.0%  | 0.0%  | 0.0%   | 19.6% | 0.0%  | 0.0%  | 0.0%  | 0.0%  | 0.0%  | 21.4% | 97.1%  |
| Turks and Caicos Islands          | 432       | 432    | -         | 63.9% | 75.9% | 63.9% | 84.1%  |       | 43.5% | 29.6% | 25.0% | 12.0% | 66.7% | 2.9%  | 98.6%  |
| Barbados                          | 186,556   | 428    | 186,128   | 7.5%  | 13.1% | 13.1% | 100.0% | 7.5%  | 8.4%  | 7.5%  | 4.7%  | 0.9%  | 13.1% | 58.8% | 82.4%  |
| Heard Island and McDonald Island: | 392       | 392    | -         | 11.2% | 0.0%  | 0.0%  | 0.0%   |       | 0.0%  | 0.0%  | 0.0%  | 0.0%  | 0.0%  | 0.0%  | 100.0% |
| Saint Helena                      | 368       | 368    | -         | 0.0%  | 0.0%  | 0.0%  | 0.0%   |       | 0.0%  | 0.0%  | 0.0%  | 0.0%  | 0.0%  | #N/A  | #N/A   |
| United States Virgin Islands      | 360       | 360    | -         | 76.7% | 58.9% | 58.9% | 100.0% |       | 32.2% | 27.8% | 23.3% | 4.4%  | 55.6% | 33.3% | 98.6%  |
| Grenada                           | 26,068    | 348    | 25,720    | 43.7% | 90.8% | 78.2% | 86.1%  | 43.3% | 89.7% | 69.0% | 1.1%  | 20.7% | 90.8% | 52.9% | 86.8%  |
| Saint Vincent and the Grenadines  | 36,832    | 348    | 36,484    | 38.7% | 81.6% | 59.8% | 73.2%  | 38.5% | 80.5% | 50.6% | 1.1%  | 29.9% | 81.6% | 44.2% | 92.3%  |

|                                      |           |     |           |        |       |       |        |        |       |       |       |       |       |        |        |
|--------------------------------------|-----------|-----|-----------|--------|-------|-------|--------|--------|-------|-------|-------|-------|-------|--------|--------|
| Cyprus No Mans Area                  | 324       | 324 | -         | 32.1%  | 37.0% | 32.1% | 86.7%  |        | 0.0%  | 0.0%  | 14.8% | 0.0%  | 14.8% | 80.8%  | 100.0% |
| Malta                                | 53,360    | 324 | 53,036    | 52.2%  | 2.5%  | 2.5%  | 100.0% | 52.4%  | 2.5%  | 2.5%  | 0.0%  | 0.0%  | 2.5%  | 9.1%   | 100.0% |
| Cayman Islands                       | 312       | 312 | -         | 87.2%  | 70.5% | 70.5% | 100.0% |        | 56.4% | 51.3% | 14.1% | 5.1%  | 70.5% | 33.8%  | 100.0% |
| Saint Kitts and Nevis                | 9,844     | 272 | 9,572     | 44.5%  | 69.1% | 69.1% | 100.0% | 43.3%  | 26.5% | 25.0% | 36.8% | 1.5%  | 63.2% | 52.5%  | 84.7%  |
| Saint Pierre and Miquelon            | 224       | 224 | -         | 17.9%  | 85.7% | 17.9% | 20.8%  |        | 21.4% | 0.0%  | 10.7% | 19.6% | 30.4% | 30.0%  | 100.0% |
| Niue                                 | 216       | 216 | -         | 16.7%  | 0.0%  | 0.0%  | 0.0%   |        | 0.0%  | 0.0%  | 0.0%  | 0.0%  | 0.0%  | 0.0%   | 66.7%  |
| Cook Islands                         | 188       | 188 | -         | 23.4%  | 0.0%  | 0.0%  | 0.0%   |        | 0.0%  | 0.0%  | 0.0%  | 0.0%  | 0.0%  | 27.3%  | 100.0% |
| Aruba                                | 172       | 172 | -         | 60.5%  | 74.4% | 60.5% | 81.3%  |        | 0.0%  | 0.0%  | 46.5% | 0.0%  | 46.5% | 42.3%  | 84.6%  |
| American Samoa                       | 164       | 164 | -         | 24.4%  | 0.0%  | 0.0%  | 0.0%   |        | 0.0%  | 0.0%  | 0.0%  | 0.0%  | 0.0%  | 0.0%   | 70.0%  |
| British Virgin Islands               | 152       | 152 | -         | 86.8%  | 73.7% | 73.7% | 100.0% |        | 52.6% | 47.4% | 15.8% | 5.3%  | 68.4% | 48.5%  | 100.0% |
| Liechtenstein                        | 148       | 148 | -         | 56.8%  | 64.9% | 56.8% | 87.5%  |        | 64.9% | 56.8% | 0.0%  | 8.1%  | 64.9% | 52.4%  | 90.5%  |
| Marshall Islands                     | 2,014,328 | 140 | 2,014,188 | 71.1%  | 0.0%  | 0.0%  | 0.0%   | 71.1%  | 0.0%  | 0.0%  | 0.0%  | 0.0%  | 0.0%  | 15.2%  | 100.0% |
| Wallis and Futuna                    | 136       | 136 | -         | 55.9%  | 0.0%  | 0.0%  | 0.0%   |        | 0.0%  | 0.0%  | 0.0%  | 0.0%  | 0.0%  | 15.8%  | 100.0% |
| Jersey                               | 128       | 128 | -         | 21.9%  | 12.5% | 12.5% | 100.0% |        | 3.1%  | 0.0%  | 3.1%  | 3.1%  | 6.3%  | 0.0%   | 85.7%  |
| Dhekelia Sovereign Base Area         | 120       | 120 | -         | 16.7%  | 6.7%  | 6.7%  | 100.0% |        | 0.0%  | 0.0%  | 0.0%  | 0.0%  | 0.0%  | 20.0%  | 100.0% |
| Indian Ocean Territories             | 104       | 104 | -         | 42.3%  | 0.0%  | 0.0%  | 0.0%   |        | 0.0%  | 0.0%  | 0.0%  | 0.0%  | 0.0%  | 0.0%   | 100.0% |
| Akrotiri Sovereign Base Area         | 104       | 104 | -         | 23.1%  | 19.2% | 19.2% | 100.0% |        | 11.5% | 7.7%  | 3.8%  | 3.8%  | 15.4% | 0.0%   | 66.7%  |
| Montserrat                           | 100       | 100 | -         | 60.0%  | 84.0% | 60.0% | 71.4%  |        | 60.0% | 28.0% | 24.0% | 32.0% | 84.0% | 20.0%  | 86.7%  |
| Maldives                             | 926,852   | 96  | 926,756   | 11.3%  | 0.0%  | 0.0%  | 0.0%   | 11.3%  | 0.0%  | 0.0%  | 0.0%  | 0.0%  | 0.0%  | 80.0%  | 100.0% |
| Anguilla                             | 76        | 76  | -         | 73.7%  | 78.9% | 73.7% | 93.3%  |        | 0.0%  | 0.0%  | 57.9% | 0.0%  | 57.9% | 35.7%  | 100.0% |
| Guernsey                             | 72        | 72  | -         | 44.4%  | 5.6%  | 5.6%  | 100.0% |        | 0.0%  | 0.0%  | 0.0%  | 0.0%  | 0.0%  | 12.5%  | 100.0% |
| Saint Martin                         | 72        | 72  | -         | 94.4%  | 66.7% | 66.7% | 100.0% |        | 16.7% | 16.7% | 44.4% | 0.0%  | 61.1% | 29.4%  | 100.0% |
| Bermuda                              | 68        | 68  | -         | 70.6%  | 0.0%  | 0.0%  | 0.0%   |        | 0.0%  | 0.0%  | 0.0%  | 0.0%  | 0.0%  | 58.3%  | 100.0% |
| San Marino                           | 64        | 64  | -         | 0.0%   | 0.0%  | 0.0%  | 0.0%   |        | 0.0%  | 0.0%  | 0.0%  | 0.0%  | 0.0%  |        |        |
| US Naval Base Guantanamo Bay         | 64        | 64  | -         | 37.5%  | 93.8% | 37.5% | 40.0%  |        | 87.5% | 25.0% | 6.3%  | 62.5% | 93.8% | 50.0%  | 100.0% |
| Pitcairn Islands                     | 44        | 44  | -         | 0.0%   | 0.0%  | 0.0%  | 0.0%   |        | 0.0%  | 0.0%  | 0.0%  | 0.0%  | 0.0%  |        |        |
| Macao S.A.R                          | 40        | 40  | -         | 50.0%  | 30.0% | 30.0% | 100.0% |        | 20.0% | 20.0% | 0.0%  | 0.0%  | 20.0% | 20.0%  | 100.0% |
| British Indian Ocean Territory       | 36        | 36  | -         | 44.4%  | 0.0%  | 0.0%  | 0.0%   |        | 0.0%  | 0.0%  | 0.0%  | 0.0%  | 0.0%  | 0.0%   | 100.0% |
| Norfolk Island                       | 32        | 32  | -         | 12.5%  | 12.5% | 12.5% | 100.0% |        | 0.0%  | 0.0%  | 0.0%  | 0.0%  | 0.0%  | 0.0%   | 100.0% |
| Nauru                                | 311,364   | 32  | 311,332   | 71.4%  | 0.0%  | 0.0%  | 0.0%   | 71.4%  | 0.0%  | 0.0%  | 0.0%  | 0.0%  | 0.0%  | 33.3%  | 100.0% |
| United States Minor Outlying Islands | 32        | 32  | -         | 0.0%   | 25.0% | 0.0%  | 0.0%   |        | 0.0%  | 0.0%  | 0.0%  | 0.0%  | 0.0%  |        |        |
| Saint Barthélemy                     | 28        | 28  | -         | 100.0% | 42.9% | 42.9% | 100.0% |        | 0.0%  | 0.0%  | 42.9% | 0.0%  | 42.9% | 85.7%  | 100.0% |
| Sint Maarten                         | 24        | 24  | -         | 83.3%  | 66.7% | 66.7% | 100.0% |        | 16.7% | 16.7% | 50.0% | 0.0%  | 66.7% | 40.0%  | 100.0% |
| Tuvalu                               | 726,192   | 20  | 726,172   | 66.1%  | 0.0%  | 0.0%  | 0.0%   | 66.1%  | 0.0%  | 0.0%  | 0.0%  | 0.0%  | 0.0%  | 0.0%   | 100.0% |
| Monaco                               | 300       | 16  | 284       | 33.3%  | 0.0%  | 0.0%  | 0.0%   | 32.4%  | 0.0%  | 0.0%  | 0.0%  | 0.0%  | 0.0%  | 0.0%   | 100.0% |
| Spratly Islands                      | 12        | 12  | -         | 100.0% | 0.0%  | 0.0%  | 0.0%   |        | 0.0%  | 0.0%  | 0.0%  | 0.0%  | 0.0%  | 0.0%   | 100.0% |
| Scarborough Reef                     | 8         | 8   | -         | 100.0% | 0.0%  | 0.0%  | 0.0%   |        | 0.0%  | 0.0%  | 0.0%  | 0.0%  | 0.0%  | 0.0%   | 100.0% |
| Serranilla Bank                      | 8         | 8   | -         | 100.0% | 0.0%  | 0.0%  | 0.0%   |        | 0.0%  | 0.0%  | 0.0%  | 0.0%  | 0.0%  | 0.0%   | 100.0% |
| Bajo Nuevo Bank (Petrel Is.)         | 4         | 4   | -         | 100.0% | 0.0%  | 0.0%  | 0.0%   |        | 0.0%  | 0.0%  | 0.0%  | 0.0%  | 0.0%  | 0.0%   | 100.0% |
| Clipperton Island                    | 4         | 4   | -         | 0.0%   | 0.0%  | 0.0%  | 0.0%   |        | 0.0%  | 0.0%  | 0.0%  | 0.0%  | 0.0%  |        |        |
| Coral Sea Islands                    | 4         | 4   | -         | 0.0%   | 0.0%  | 0.0%  | 0.0%   |        | 0.0%  | 0.0%  | 0.0%  | 0.0%  | 0.0%  |        |        |
| Gibraltar                            | 388       | 4   | 384       | 100.0% | 0.0%  | 0.0%  | 0.0%   | 100.0% | 0.0%  | 0.0%  | 0.0%  | 0.0%  | 0.0%  | 100.0% | 100.0% |
| Vatican                              | 4         | 4   | -         | 0.0%   | 0.0%  | 0.0%  | 0.0%   |        | 0.0%  | 0.0%  | 0.0%  | 0.0%  | 0.0%  |        |        |

**SI Table 2. Human population benefitting from and living on critical natural assets.**

| Country (ranked by population)   | Total population (Landscan 2017) | Population on land that is critical natural assets for local NCP (LCNA) | Population on land critical for global NCP (GCNA) | Percent of population living on LCNA | Percent of population living on GCNA | Ratio of % pop to % land for LCNA | Ratio of % pop to % land for GCNA | Population benefitting from LCNA | Population benefitting from GCNA | Percent of population benefitting from LCNA | Percent of population benefitting from GCNA | Ratio of pop benefitting to pop living on LCNA | Ratio of pop benefitting to pop living on GCNA |
|----------------------------------|----------------------------------|-------------------------------------------------------------------------|---------------------------------------------------|--------------------------------------|--------------------------------------|-----------------------------------|-----------------------------------|----------------------------------|----------------------------------|---------------------------------------------|---------------------------------------------|------------------------------------------------|------------------------------------------------|
| Global                           | 7,341,941,858                    | 1,168,934,232                                                           | 771,148,868                                       | 15.9%                                | 10.5%                                | 0.523                             | 0.273                             | 6,389,108,220                    | 5,369,617,498                    | 87.0%                                       | 73.1%                                       | 5.466                                          | 6.963                                          |
| China                            | 1,370,730,445                    | 136,967,856                                                             | 82,980,379                                        | 10.0%                                | 6.1%                                 | 0.394                             | 0.159                             | 1,121,101,594                    | 890,449,284                      | 81.8%                                       | 10.0%                                       | 8.185                                          | 1.651                                          |
| India                            | 1,278,133,079                    | 88,485,930                                                              | 50,633,003                                        | 6.9%                                 | 4.0%                                 | 0.357                             | 0.199                             | 921,797,950                      | 655,768,365                      | 72.1%                                       | 6.9%                                        | 10.417                                         | 1.748                                          |
| United States of America         | 323,806,117                      | 92,689,394                                                              | 80,664,054                                        | 28.6%                                | 24.9%                                | 0.766                             | 0.471                             | 320,403,145                      | 311,306,286                      | 98.9%                                       | 28.6%                                       | 3.457                                          | 1.149                                          |
| Indonesia                        | 254,421,809                      | 37,878,004                                                              | 16,280,107                                        | 14.9%                                | 6.4%                                 | 0.452                             | 0.110                             | 244,939,654                      | 230,594,870                      | 96.3%                                       | 14.9%                                       | 6.467                                          | 2.327                                          |
| Brazil                           | 204,578,040                      | 53,052,869                                                              | 35,002,397                                        | 25.9%                                | 17.1%                                | 0.564                             | 0.243                             | 201,914,446                      | 199,952,596                      | 98.7%                                       | 25.9%                                       | 3.806                                          | 1.516                                          |
| Pakistan                         | 204,166,120                      | 16,198,897                                                              | 10,576,391                                        | 7.9%                                 | 5.2%                                 | 0.383                             | 0.319                             | 155,734,897                      | 115,600,400                      | 76.3%                                       | 7.9%                                        | 9.614                                          | 1.532                                          |
| Nigeria                          | 188,649,700                      | 30,174,379                                                              | 27,748,061                                        | 16.0%                                | 14.7%                                | 0.592                             | 0.471                             | 153,898,199                      | 126,478,041                      | 81.6%                                       | 16.0%                                       | 5.100                                          | 1.087                                          |
| Bangladesh                       | 157,117,529                      | 13,698,772                                                              | 5,998,490                                         | 8.7%                                 | 3.8%                                 | 0.490                             | 0.240                             | 137,103,359                      | 111,984,561                      | 87.3%                                       | 8.7%                                        | 10.008                                         | 2.284                                          |
| Russia                           | 144,144,677                      | 28,516,962                                                              | 23,774,810                                        | 19.8%                                | 16.5%                                | 1.110                             | 0.461                             | 138,137,303                      | 136,757,367                      | 95.8%                                       | 19.8%                                       | 4.844                                          | 1.199                                          |
| Japan                            | 125,239,921                      | 15,017,870                                                              | 3,528,044                                         | 12.0%                                | 2.8%                                 | 0.248                             | 0.107                             | 123,941,148                      | 119,894,505                      | 99.0%                                       | 12.0%                                       | 8.253                                          | 4.257                                          |
| Mexico                           | 123,993,577                      | 25,401,136                                                              | 9,870,496                                         | 20.5%                                | 8.0%                                 | 0.417                             | 0.241                             | 122,195,434                      | 93,782,223                       | 98.5%                                       | 20.5%                                       | 4.811                                          | 2.573                                          |
| Ethiopia                         | 105,206,039                      | 32,855,419                                                              | 33,405,019                                        | 31.2%                                | 31.8%                                | 0.661                             | 0.516                             | 90,897,374                       | 90,311,138                       | 86.4%                                       | 31.2%                                       | 2.767                                          | 0.984                                          |
| Egypt                            | 98,727,615                       | 3,812,238                                                               | 145,998                                           | 3.9%                                 | 0.1%                                 | 5.435                             | 1.698                             | 95,344,349                       | 44,418,846                       | 96.6%                                       | 3.9%                                        | 25.010                                         | 26.112                                         |
| Philippines                      | 97,898,021                       | 15,988,760                                                              | 3,096,444                                         | 16.3%                                | 3.2%                                 | 0.600                             | 0.124                             | 93,484,786                       | 82,187,345                       | 95.5%                                       | 16.3%                                       | 5.847                                          | 5.164                                          |
| Vietnam                          | 95,036,501                       | 11,495,970                                                              | 5,867,111                                         | 12.1%                                | 6.2%                                 | 0.311                             | 0.145                             | 92,859,430                       | 84,897,422                       | 97.7%                                       | 12.1%                                       | 8.078                                          | 1.959                                          |
| Democratic Republic of the Congo | 82,863,685                       | 29,354,443                                                              | 30,967,493                                        | 35.4%                                | 37.4%                                | 0.502                             | 0.431                             | 74,755,318                       | 76,216,225                       | 90.2%                                       | 35.4%                                       | 2.547                                          | 0.948                                          |
| Iran                             | 81,452,008                       | 4,310,973                                                               | 3,224,677                                         | 5.3%                                 | 4.0%                                 | 0.601                             | 0.358                             | 71,015,774                       | 61,520,235                       | 87.2%                                       | 5.3%                                        | 16.473                                         | 1.337                                          |
| Germany                          | 80,593,192                       | 16,166,956                                                              | 16,508,367                                        | 20.1%                                | 20.5%                                | 0.523                             | 0.442                             | 80,544,646                       | 80,502,951                       | 99.9%                                       | 20.1%                                       | 4.982                                          | 0.979                                          |
| Turkey                           | 80,143,741                       | 12,441,988                                                              | 8,512,473                                         | 15.5%                                | 10.6%                                | 0.506                             | 0.292                             | 76,682,318                       | 75,576,769                       | 95.7%                                       | 15.5%                                       | 6.163                                          | 1.462                                          |
| Thailand                         | 68,142,105                       | 4,238,765                                                               | 2,238,970                                         | 6.2%                                 | 3.3%                                 | 0.277                             | 0.111                             | 66,102,827                       | 61,558,169                       | 97.0%                                       | 6.2%                                        | 15.595                                         | 1.893                                          |
| France                           | 65,735,954                       | 12,515,094                                                              | 9,930,964                                         | 19.0%                                | 15.1%                                | 0.566                             | 0.328                             | 65,331,520                       | 63,169,365                       | 99.4%                                       | 19.0%                                       | 5.220                                          | 1.260                                          |
| United Kingdom                   | 64,098,136                       | 15,403,218                                                              | 13,682,601                                        | 24.0%                                | 21.3%                                | 0.501                             | 0.413                             | 63,471,562                       | 62,736,916                       | 99.0%                                       | 24.0%                                       | 4.121                                          | 1.126                                          |
| Italy                            | 61,240,480                       | 7,929,664                                                               | 5,085,296                                         | 12.9%                                | 8.3%                                 | 0.408                             | 0.252                             | 60,132,414                       | 56,320,521                       | 98.2%                                       | 12.9%                                       | 7.583                                          | 1.559                                          |
| South Africa                     | 54,657,349                       | 19,895,337                                                              | 5,092,550                                         | 36.4%                                | 9.3%                                 | 0.614                             | 0.735                             | 53,838,279                       | 41,179,075                       | 98.5%                                       | 36.4%                                       | 2.706                                          | 3.907                                          |
| United Republic of Tanzania      | 53,633,880                       | 16,774,742                                                              | 15,310,375                                        | 31.3%                                | 28.5%                                | 0.684                             | 0.452                             | 49,533,541                       | 46,719,072                       | 92.4%                                       | 31.3%                                       | 2.953                                          | 1.096                                          |
| Myanmar                          | 53,484,510                       | 6,819,231                                                               | 5,226,354                                         | 12.7%                                | 9.8%                                 | 0.262                             | 0.152                             | 42,544,083                       | 35,522,508                       | 79.5%                                       | 12.7%                                       | 6.239                                          | 1.305                                          |
| South Korea                      | 50,315,468                       | 9,238,749                                                               | 672,164                                           | 18.4%                                | 1.3%                                 | 0.468                             | 0.122                             | 49,901,414                       | 46,863,091                       | 99.2%                                       | 18.4%                                       | 5.401                                          | 13.745                                         |
| Spain                            | 48,031,946                       | 9,769,735                                                               | 4,413,926                                         | 20.3%                                | 9.2%                                 | 0.573                             | 0.287                             | 46,945,353                       | 42,382,637                       | 97.7%                                       | 20.3%                                       | 4.805                                          | 2.213                                          |
| Colombia                         | 47,355,574                       | 13,046,700                                                              | 12,495,809                                        | 27.6%                                | 26.4%                                | 0.575                             | 0.308                             | 46,594,767                       | 45,802,441                       | 98.4%                                       | 27.6%                                       | 3.571                                          | 1.044                                          |
| Kenya                            | 47,102,899                       | 12,165,359                                                              | 11,551,089                                        | 25.8%                                | 24.5%                                | 0.536                             | 0.373                             | 42,446,651                       | 41,731,590                       | 90.1%                                       | 25.8%                                       | 3.489                                          | 1.053                                          |
| Argentina                        | 44,284,392                       | 7,302,668                                                               | 3,327,867                                         | 16.5%                                | 7.5%                                 | 0.373                             | 0.326                             | 42,807,246                       | 37,050,399                       | 96.7%                                       | 16.5%                                       | 5.862                                          | 2.194                                          |
| Ukraine                          | 41,708,795                       | 3,363,002                                                               | 2,780,221                                         | 8.1%                                 | 6.7%                                 | 0.495                             | 0.370                             | 38,750,223                       | 38,058,925                       | 92.9%                                       | 8.1%                                        | 11.523                                         | 1.210                                          |
| Algeria                          | 40,728,545                       | 7,037,439                                                               | 2,645,410                                         | 17.3%                                | 6.5%                                 | 6.125                             | 2.130                             | 35,804,305                       | 24,464,776                       | 87.9%                                       | 17.3%                                       | 5.088                                          | 2.660                                          |
| Iraq                             | 40,335,504                       | 969,294                                                                 | 215,113                                           | 2.4%                                 | 0.5%                                 | 1.566                             | 0.466                             | 31,931,815                       | 23,861,691                       | 79.2%                                       | 2.4%                                        | 32.943                                         | 4.506                                          |
| Uganda                           | 39,730,276                       | 4,586,510                                                               | 4,562,523                                         | 11.5%                                | 11.5%                                | 0.362                             | 0.317                             | 33,962,261                       | 32,914,413                       | 85.5%                                       | 11.5%                                       | 7.405                                          | 1.005                                          |
| Poland                           | 38,548,752                       | 5,969,387                                                               | 6,095,178                                         | 15.5%                                | 15.8%                                | 0.480                             | 0.412                             | 38,536,972                       | 38,539,364                       | 100.0%                                      | 15.5%                                       | 6.456                                          | 0.979                                          |
| Sudan                            | 37,353,956                       | 10,342,147                                                              | 5,037,275                                         | 27.7%                                | 13.5%                                | 1.492                             | 0.928                             | 32,026,917                       | 20,814,860                       | 85.7%                                       | 27.7%                                       | 3.097                                          | 2.053                                          |
| Canada                           | 34,476,073                       | 7,195,593                                                               | 4,390,118                                         | 20.9%                                | 12.7%                                | 1.952                             | 0.459                             | 33,896,058                       | 32,737,887                       | 98.3%                                       | 20.9%                                       | 4.711                                          | 1.639                                          |
| Afghanistan                      | 34,095,851                       | 8,937,048                                                               | 9,619,524                                         | 26.2%                                | 28.2%                                | 0.948                             | 0.616                             | 31,892,732                       | 32,587,792                       | 93.5%                                       | 26.2%                                       | 3.569                                          | 0.929                                          |
| Morocco                          | 34,044,087                       | 6,483,979                                                               | 1,504,189                                         | 19.0%                                | 4.4%                                 | 1.189                             | 0.616                             | 31,796,604                       | 22,334,090                       | 93.4%                                       | 19.0%                                       | 4.904                                          | 4.311                                          |
| Peru                             | 30,978,783                       | 11,105,547                                                              | 6,537,870                                         | 35.8%                                | 21.1%                                | 0.627                             | 0.280                             | 30,135,549                       | 18,088,017                       | 97.3%                                       | 35.8%                                       | 2.714                                          | 1.699                                          |
| Venezuela                        | 30,880,169                       | 9,131,402                                                               | 5,173,372                                         | 29.6%                                | 16.8%                                | 0.491                             | 0.210                             | 30,229,025                       | 29,112,431                       | 97.9%                                       | 29.6%                                       | 3.310                                          | 1.765                                          |

|                    |            |            |            |       |       |       |       |            |            |        |       |        |           |
|--------------------|------------|------------|------------|-------|-------|-------|-------|------------|------------|--------|-------|--------|-----------|
| Nepal              | 30,593,400 | 6,987,071  | 7,053,216  | 22.8% | 23.1% | 0.442 | 0.354 | 27,279,292 | 27,225,436 | 89.2%  | 22.8% | 3.904  | 0.991     |
| Malaysia           | 30,011,529 | 3,983,654  | 1,755,630  | 13.3% | 5.8%  | 0.298 | 0.104 | 29,287,853 | 27,658,771 | 97.6%  | 13.3% | 7.352  | 2.269     |
| Uzbekistan         | 29,799,358 | 946,323    | 776,507    | 3.2%  | 2.6%  | 0.281 | 0.191 | 25,466,443 | 22,242,395 | 85.5%  | 3.2%  | 26.911 | 1.219     |
| Angola             | 29,183,564 | 14,700,041 | 12,895,337 | 50.4% | 44.2% | 0.765 | 0.494 | 28,295,356 | 27,161,838 | 97.0%  | 50.4% | 1.925  | 1.140     |
| Saudi Arabia       | 28,124,932 | 1,956,729  | 1,684      | 7.0%  | 0.0%  | 3.202 | 0.466 | 16,732,351 | 137,639    | 59.5%  | 7.0%  | 8.551  | 1,161.953 |
| Yemen              | 27,895,190 | 8,108,278  | 25,988     | 29.1% | 0.1%  | 2.928 | 3.659 | 20,286,191 | 1,025,233  | 72.7%  | 29.1% | 2.502  | 312.001   |
| Ghana              | 27,287,268 | 2,640,184  | 1,829,416  | 9.7%  | 6.7%  | 0.225 | 0.153 | 20,374,440 | 16,544,090 | 74.7%  | 9.7%  | 7.717  | 1.443     |
| Mozambique         | 26,560,095 | 12,582,904 | 10,107,029 | 47.4% | 38.1% | 0.766 | 0.522 | 25,762,102 | 22,104,895 | 97.0%  | 47.4% | 2.047  | 1.245     |
| Cameroon           | 24,953,119 | 7,287,435  | 7,467,623  | 29.2% | 29.9% | 0.468 | 0.360 | 22,841,594 | 22,567,703 | 91.5%  | 29.2% | 3.134  | 0.976     |
| Madagascar         | 24,819,901 | 13,785,553 | 10,547,279 | 55.5% | 42.5% | 0.854 | 0.659 | 23,783,289 | 21,089,185 | 95.8%  | 55.5% | 1.725  | 1.307     |
| Ivory Coast        | 23,599,114 | 2,953,176  | 2,870,149  | 12.5% | 12.2% | 0.335 | 0.260 | 14,656,774 | 14,139,262 | 62.1%  | 12.5% | 4.963  | 1.029     |
| North Korea        | 23,401,940 | 4,246,197  | 682,155    | 18.1% | 2.9%  | 0.372 | 0.113 | 22,773,176 | 14,234,123 | 97.3%  | 18.1% | 5.363  | 6.225     |
| Taiwan             | 23,085,648 | 2,030,945  | 358,142    | 8.8%  | 1.6%  | 0.222 | 0.066 | 23,015,392 | 22,824,713 | 99.7%  | 8.8%  | 11.332 | 5.671     |
| Australia          | 22,849,333 | 5,705,191  | 2,576,895  | 25.0% | 11.3% | 1.024 | 1.077 | 22,417,286 | 21,405,879 | 98.1%  | 25.0% | 3.929  | 2.214     |
| Sri Lanka          | 22,137,848 | 7,376,273  | 3,908,519  | 33.3% | 17.7% | 0.844 | 0.544 | 21,979,776 | 21,675,401 | 99.3%  | 33.3% | 2.980  | 1.887     |
| Romania            | 21,459,263 | 2,884,618  | 2,899,927  | 13.4% | 13.5% | 0.382 | 0.330 | 20,730,683 | 20,541,668 | 96.6%  | 13.4% | 7.187  | 0.995     |
| Burkina Faso       | 20,160,229 | 2,650,836  | 387,533    | 13.1% | 1.9%  | 0.582 | 0.337 | 12,726,056 | 3,793,231  | 63.1%  | 13.1% | 4.801  | 6.840     |
| Niger              | 19,236,051 | 7,093,159  | 7,744      | 36.9% | 0.0%  | 2.029 | 0.315 | 17,585,819 | 127,116    | 91.4%  | 36.9% | 2.479  | 915.955   |
| Malawi             | 19,172,271 | 2,911,717  | 1,752,459  | 15.2% | 9.1%  | 0.605 | 0.528 | 18,365,152 | 15,909,947 | 95.8%  | 15.2% | 6.307  | 1.662     |
| Kazakhstan         | 18,469,884 | 3,547,563  | 3,334,665  | 19.2% | 18.1% | 0.546 | 0.327 | 17,190,748 | 17,049,572 | 93.1%  | 19.2% | 4.846  | 1.064     |
| Syria              | 18,078,901 | 952,754    | 562,306    | 5.3%  | 3.1%  | 1.371 | 1.114 | 15,833,615 | 13,227,577 | 87.6%  | 5.3%  | 16.619 | 1.694     |
| Mali               | 17,924,669 | 3,901,798  | 567,724    | 21.8% | 3.2%  | 1.174 | 0.768 | 14,235,256 | 6,603,424  | 79.4%  | 21.8% | 3.648  | 6.873     |
| Chile              | 17,538,346 | 5,804,057  | 1,570,091  | 33.1% | 9.0%  | 1.336 | 0.244 | 17,250,202 | 15,478,976 | 98.4%  | 33.1% | 2.972  | 3.697     |
| Netherlands        | 16,952,999 | 4,249,024  | 3,322,790  | 25.1% | 19.6% | 0.556 | 0.455 | 16,906,288 | 16,805,413 | 99.7%  | 25.1% | 3.979  | 1.279     |
| Cambodia           | 16,167,046 | 1,383,540  | 753,404    | 8.6%  | 4.7%  | 0.205 | 0.103 | 14,977,765 | 13,546,661 | 92.6%  | 8.6%  | 10.826 | 1.836     |
| Zambia             | 15,901,762 | 6,702,292  | 7,063,437  | 42.1% | 44.4% | 0.617 | 0.543 | 15,594,987 | 15,664,511 | 98.1%  | 42.1% | 2.327  | 0.949     |
| Ecuador            | 15,625,817 | 5,359,966  | 4,152,070  | 34.3% | 26.6% | 0.694 | 0.348 | 14,964,415 | 14,613,910 | 95.8%  | 34.3% | 2.792  | 1.291     |
| Guatemala          | 15,469,543 | 8,253,278  | 5,169,708  | 53.4% | 33.4% | 1.082 | 0.600 | 15,274,990 | 14,792,750 | 98.7%  | 53.4% | 1.851  | 1.596     |
| Senegal            | 14,495,435 | 2,364,104  | 125,418    | 16.3% | 0.9%  | 0.307 | 0.203 | 6,408,641  | 624,241    | 44.2%  | 16.3% | 2.711  | 18.850    |
| Zimbabwe           | 13,748,107 | 4,199,488  | 4,679,260  | 30.5% | 34.0% | 0.616 | 0.555 | 13,206,804 | 13,254,149 | 96.1%  | 30.5% | 3.145  | 0.897     |
| South Sudan        | 12,974,180 | 8,276,157  | 8,894,975  | 63.8% | 68.6% | 0.807 | 0.725 | 12,676,631 | 12,943,655 | 97.7%  | 63.8% | 1.532  | 0.930     |
| Guinea             | 12,340,694 | 4,929,610  | 3,729,441  | 39.9% | 30.2% | 0.630 | 0.479 | 12,041,815 | 10,773,549 | 97.6%  | 39.9% | 2.443  | 1.322     |
| Chad               | 12,175,771 | 3,588,821  | 1,356,201  | 29.5% | 11.1% | 1.373 | 0.768 | 10,154,030 | 6,022,361  | 83.4%  | 29.5% | 2.829  | 2.646     |
| Rwanda             | 11,963,961 | 1,591,662  | 1,410,268  | 13.3% | 11.8% | 0.600 | 0.503 | 4,477,667  | 3,514,880  | 37.4%  | 13.3% | 2.813  | 1.129     |
| Belgium            | 11,537,984 | 1,593,287  | 1,459,625  | 13.8% | 12.7% | 0.428 | 0.354 | 11,537,502 | 11,537,381 | 100.0% | 13.8% | 7.241  | 1.092     |
| Burundi            | 11,504,302 | 2,452,579  | 2,399,609  | 21.3% | 20.9% | 0.696 | 0.641 | 11,163,503 | 10,901,545 | 97.0%  | 21.3% | 4.552  | 1.022     |
| Tunisia            | 11,222,162 | 946,281    | 157,609    | 8.4%  | 1.4%  | 1.046 | 0.405 | 10,372,409 | 3,152,730  | 92.4%  | 8.4%  | 10.961 | 6.004     |
| Benin              | 11,107,123 | 1,545,576  | 1,275,130  | 13.9% | 11.5% | 0.305 | 0.231 | 9,512,825  | 8,837,572  | 85.6%  | 13.9% | 6.155  | 1.212     |
| Bolivia            | 11,032,684 | 3,409,936  | 3,677,689  | 30.9% | 33.3% | 0.511 | 0.402 | 10,688,546 | 10,946,719 | 96.9%  | 30.9% | 3.135  | 0.927     |
| Cuba               | 10,983,207 | 2,278,618  | 325,491    | 20.7% | 3.0%  | 0.541 | 0.163 | 10,941,840 | 8,911,485  | 99.6%  | 20.7% | 4.802  | 7.001     |
| Czechia            | 10,627,182 | 1,852,064  | 2,031,222  | 17.4% | 19.1% | 0.447 | 0.421 | 10,627,182 | 10,627,182 | 100.0% | 17.4% | 5.738  | 0.912     |
| Portugal           | 10,535,151 | 2,151,436  | 551,744    | 20.4% | 5.2%  | 0.549 | 0.212 | 10,302,456 | 7,996,576  | 97.8%  | 20.4% | 4.789  | 3.899     |
| Dominican Republic | 10,455,716 | 2,478,040  | 564,098    | 23.7% | 5.4%  | 0.484 | 0.160 | 10,064,962 | 8,879,523  | 96.3%  | 23.7% | 4.062  | 4.393     |
| Greece             | 10,399,857 | 1,762,910  | 724,722    | 17.0% | 7.0%  | 0.380 | 0.167 | 10,290,822 | 9,575,140  | 99.0%  | 17.0% | 5.837  | 2.433     |
| Haiti              | 10,207,934 | 5,364,900  | 1,460,629  | 52.6% | 14.3% | 0.804 | 0.648 | 10,102,912 | 8,414,268  | 99.0%  | 52.6% | 1.883  | 3.673     |
| Azerbaijan         | 9,922,452  | 644,103    | 424,576    | 6.5%  | 4.3%  | 0.255 | 0.166 | 9,163,779  | 8,468,038  | 92.4%  | 6.5%  | 14.227 | 1.517     |
| Hungary            | 9,861,803  | 912,881    | 875,976    | 9.3%  | 8.9%  | 0.405 | 0.337 | 9,825,901  | 9,828,569  | 99.6%  | 9.3%  | 10.764 | 1.042     |
| Belarus            | 9,555,690  | 1,192,055  | 1,175,570  | 12.5% | 12.3% | 0.325 | 0.268 | 9,541,249  | 9,551,242  | 99.8%  | 12.5% | 8.004  | 1.014     |
| Sweden             | 9,512,654  | 4,154,165  | 3,511,365  | 43.7% | 36.9% | 1.321 | 0.470 | 8,870,504  | 8,881,920  | 93.2%  | 43.7% | 2.135  | 1.183     |
| Jordan             | 9,225,528  | 289,148    | 151,580    | 3.1%  | 1.6%  | 2.156 | 2.034 | 8,702,319  | 7,810,837  | 94.3%  | 3.1%  | 30.096 | 1.908     |

|                          |           |           |           |       |       |       |       |           |           |       |       |        |         |
|--------------------------|-----------|-----------|-----------|-------|-------|-------|-------|-----------|-----------|-------|-------|--------|---------|
| Honduras                 | 8,950,218 | 2,608,031 | 952,404   | 29.1% | 10.6% | 0.566 | 0.203 | 8,849,393 | 8,283,556 | 98.9% | 29.1% | 3.393  | 2.738   |
| Austria                  | 8,781,279 | 2,669,998 | 2,898,054 | 30.4% | 33.0% | 0.514 | 0.464 | 8,773,419 | 8,781,213 | 99.9% | 30.4% | 3.286  | 0.921   |
| Tajikistan               | 8,509,930 | 727,363   | 749,831   | 8.5%  | 8.8%  | 0.255 | 0.242 | 8,072,251 | 8,037,731 | 94.9% | 8.5%  | 11.098 | 0.970   |
| Switzerland              | 8,301,755 | 2,585,189 | 2,820,431 | 31.1% | 34.0% | 0.548 | 0.485 | 8,290,655 | 8,301,406 | 99.9% | 31.1% | 3.207  | 0.917   |
| Somalia                  | 7,992,709 | 3,828,754 | 2,390,691 | 47.9% | 29.9% | 0.784 | 0.512 | 7,605,098 | 4,815,115 | 95.2% | 47.9% | 1.986  | 1.602   |
| Togo                     | 7,982,507 | 1,256,002 | 994,683   | 15.7% | 12.5% | 0.372 | 0.276 | 6,380,166 | 5,516,143 | 79.9% | 15.7% | 5.080  | 1.263   |
| Israel                   | 7,629,219 | 508,231   | 99,622    | 6.7%  | 1.3%  | 1.102 | 0.388 | 7,366,358 | 3,359,366 | 96.6% | 6.7%  | 14.494 | 5.102   |
| Republic of Serbia       | 7,163,415 | 644,937   | 694,465   | 9.0%  | 9.7%  | 0.257 | 0.240 | 7,078,879 | 7,021,272 | 98.8% | 9.0%  | 10.976 | 0.929   |
| Bulgaria                 | 7,106,711 | 764,233   | 709,872   | 10.8% | 10.0% | 0.334 | 0.250 | 6,786,060 | 6,693,985 | 95.5% | 10.8% | 8.880  | 1.077   |
| Laos                     | 7,073,997 | 2,084,199 | 2,097,934 | 29.5% | 29.7% | 0.430 | 0.369 | 6,742,622 | 6,799,999 | 95.3% | 29.5% | 3.235  | 0.993   |
| Paraguay                 | 6,894,793 | 1,814,242 | 2,030,354 | 26.3% | 29.4% | 0.420 | 0.384 | 6,856,637 | 6,888,175 | 99.4% | 26.3% | 3.779  | 0.894   |
| Hong Kong S.A.R.         | 6,849,951 | 2,881,166 | 44,970    | 42.1% | 0.7%  | 0.816 | 0.132 | 6,269,084 | 5,733,951 | 91.5% | 42.1% | 2.176  | 64.069  |
| Libya                    | 6,731,508 | 563,938   | 6,284     | 8.4%  | 0.1%  | 9.879 | 3.044 | 6,146,587 | 337,977   | 91.3% | 8.4%  | 10.899 | 89.742  |
| Papua New Guinea         | 6,466,968 | 3,238,004 | 2,841,604 | 50.1% | 43.9% | 0.958 | 0.518 | 6,111,465 | 6,097,351 | 94.5% | 50.1% | 1.887  | 1.139   |
| Lebanon                  | 6,200,285 | 1,805,177 | 227,518   | 29.1% | 3.7%  | 1.015 | 0.838 | 6,147,984 | 5,038,301 | 99.2% | 29.1% | 3.406  | 7.934   |
| El Salvador              | 6,133,006 | 2,217,125 | 175,518   | 36.2% | 2.9%  | 0.585 | 0.179 | 6,118,290 | 5,618,695 | 99.8% | 36.2% | 2.760  | 12.632  |
| Nicaragua                | 5,988,125 | 1,796,236 | 584,101   | 30.0% | 9.8%  | 0.691 | 0.253 | 5,881,397 | 5,387,183 | 98.2% | 30.0% | 3.274  | 3.075   |
| Sierra Leone             | 5,934,755 | 1,230,334 | 533,348   | 20.7% | 9.0%  | 0.797 | 0.387 | 5,315,207 | 4,364,883 | 89.6% | 20.7% | 4.320  | 2.307   |
| Eritrea                  | 5,887,782 | 2,133,453 | 749,195   | 36.2% | 12.7% | 1.574 | 1.083 | 5,481,449 | 4,534,726 | 93.1% | 36.2% | 2.569  | 2.848   |
| Kyrgyzstan               | 5,722,700 | 728,242   | 766,025   | 12.7% | 13.4% | 0.296 | 0.242 | 5,678,312 | 5,681,381 | 99.2% | 12.7% | 7.797  | 0.951   |
| Singapore                | 5,606,590 | 500,881   | 157,043   | 8.9%  | 2.8%  | 0.505 | 0.303 | 5,493,693 | 5,218,573 | 98.0% | 8.9%  | 10.968 | 3.189   |
| Central African Republic | 5,603,671 | 3,449,326 | 3,544,657 | 61.6% | 63.3% | 0.762 | 0.646 | 5,572,435 | 5,601,786 | 99.4% | 61.6% | 1.616  | 0.973   |
| United Arab Emirates     | 5,501,365 | 457,274   | 23        | 8.3%  | 0.0%  | 2.075 | 0.012 | 4,779,657 | 172,563   | 86.9% | 8.3%  | 10.453 | #####   |
| Slovakia                 | 5,429,724 | 817,470   | 945,823   | 15.1% | 17.4% | 0.338 | 0.334 | 5,424,595 | 5,425,368 | 99.9% | 15.1% | 6.636  | 0.864   |
| Denmark                  | 5,351,816 | 1,333,497 | 126,759   | 24.9% | 2.4%  | 1.205 | 0.370 | 5,277,334 | 4,486,513 | 98.6% | 24.9% | 3.958  | 10.520  |
| Turkmenistan             | 5,331,160 | 272,305   | 158,775   | 5.1%  | 3.0%  | 0.433 | 0.224 | 4,207,239 | 2,700,081 | 78.9% | 5.1%  | 15.450 | 1.715   |
| Finland                  | 5,308,910 | 2,966,577 | 2,681,338 | 55.9% | 50.5% | 1.350 | 0.604 | 5,113,781 | 5,189,877 | 96.3% | 55.9% | 1.724  | 1.106   |
| Palestine                | 5,257,405 | 409,933   | 151,082   | 7.8%  | 2.9%  | 0.352 | 0.205 | 4,770,632 | 1,738,892 | 90.7% | 7.8%  | 11.638 | 2.713   |
| Republic of the Congo    | 4,995,844 | 1,633,168 | 1,258,645 | 32.7% | 25.2% | 0.479 | 0.282 | 4,841,650 | 4,706,341 | 96.9% | 32.7% | 2.965  | 1.298   |
| Costa Rica               | 4,918,985 | 1,435,492 | 559,949   | 29.2% | 11.4% | 0.526 | 0.216 | 4,898,733 | 4,859,068 | 99.6% | 29.2% | 3.413  | 2.564   |
| Georgia                  | 4,888,034 | 863,572   | 820,924   | 17.7% | 16.8% | 0.422 | 0.277 | 4,799,121 | 4,824,696 | 98.2% | 17.7% | 5.557  | 1.052   |
| Ireland                  | 4,886,468 | 2,655,786 | 2,178,225 | 54.3% | 44.6% | 0.736 | 0.593 | 4,858,876 | 4,747,318 | 99.4% | 54.3% | 1.830  | 1.219   |
| Norway                   | 4,564,747 | 2,113,438 | 1,317,449 | 46.3% | 28.9% | 1.800 | 0.773 | 4,123,817 | 3,928,572 | 90.3% | 46.3% | 1.951  | 1.604   |
| Liberia                  | 4,326,013 | 820,020   | 465,885   | 19.0% | 10.8% | 0.615 | 0.238 | 3,265,752 | 3,108,127 | 75.5% | 19.0% | 3.983  | 1.760   |
| New Zealand              | 4,066,381 | 1,942,277 | 644,354   | 47.8% | 15.8% | 0.790 | 0.252 | 3,911,698 | 3,632,233 | 96.2% | 47.8% | 2.014  | 3.014   |
| Croatia                  | 4,022,835 | 757,206   | 547,245   | 18.8% | 13.6% | 0.435 | 0.280 | 3,882,896 | 3,797,386 | 96.5% | 18.8% | 5.128  | 1.384   |
| Bosnia and Herzegovina   | 3,886,733 | 895,166   | 1,007,049 | 23.0% | 25.9% | 0.403 | 0.377 | 3,875,403 | 3,881,522 | 99.7% | 23.0% | 4.329  | 0.889   |
| Mauritania               | 3,767,659 | 1,689,921 | 2,317     | 44.9% | 0.1%  | 3.839 | 2.465 | 3,347,098 | 58,646    | 88.8% | 44.9% | 1.981  | 729.357 |
| Panama                   | 3,656,505 | 965,393   | 474,478   | 26.4% | 13.0% | 0.597 | 0.218 | 3,619,795 | 3,532,853 | 99.0% | 26.4% | 3.750  | 2.035   |
| Moldova                  | 3,415,404 | 106,241   | 99,321    | 3.1%  | 2.9%  | 0.442 | 0.365 | 2,908,086 | 2,900,367 | 85.1% | 3.1%  | 27.373 | 1.070   |
| Oman                     | 3,389,456 | 439,409   | -         | 13.0% | 0.0%  | 3.231 |       | 2,788,494 | -         | 82.3% | 13.0% | 6.346  |         |
| Uruguay                  | 3,354,933 | 694,467   | 70,065    | 20.7% | 2.1%  | 0.309 | 0.320 | 3,263,163 | 2,581,882 | 97.3% | 20.7% | 4.699  | 9.912   |
| Puerto Rico              | 3,309,835 | 1,439,071 | 462,468   | 43.5% | 14.0% | 0.622 | 0.333 | 3,305,405 | 3,299,759 | 99.9% | 43.5% | 2.297  | 3.112   |
| Somaliiland              | 3,204,281 | 1,632,447 | 58,751    | 50.9% | 1.8%  | 0.991 | 0.248 | 3,099,928 | 1,142,552 | 96.7% | 50.9% | 1.899  | 27.786  |
| Mongolia                 | 3,073,670 | 1,039,039 | 670,406   | 33.8% | 21.8% | 1.137 | 0.745 | 2,800,905 | 2,805,765 | 91.1% | 33.8% | 2.696  | 1.550   |
| Armenia                  | 3,030,410 | 196,721   | 199,043   | 6.5%  | 6.6%  | 0.225 | 0.183 | 2,998,862 | 2,998,128 | 99.0% | 6.5%  | 15.244 | 0.988   |
| Albania                  | 3,029,644 | 341,638   | 270,951   | 11.3% | 8.9%  | 0.292 | 0.218 | 2,990,849 | 2,791,399 | 98.7% | 11.3% | 8.754  | 1.261   |
| Jamaica                  | 2,893,649 | 1,026,859 | 290,166   | 35.5% | 10.0% | 0.557 | 0.232 | 2,841,701 | 2,755,103 | 98.2% | 35.5% | 2.767  | 3.539   |
| Kuwait                   | 2,852,295 | 126,841   | -         | 4.4%  | 0.0%  | 3.545 | 0.000 | 2,379,930 | 8         | 83.4% | 4.4%  | 18.763 |         |
| Lithuania                | 2,818,468 | 467,998   | 466,740   | 16.6% | 16.6% | 0.467 | 0.404 | 2,815,317 | 2,815,297 | 99.9% | 16.6% | 6.016  | 1.003   |



|                              |           |           |         |       |       |       |       |           |           |        |       |        |         |
|------------------------------|-----------|-----------|---------|-------|-------|-------|-------|-----------|-----------|--------|-------|--------|---------|
| Namibia                      | 2,494,956 | 1,303,297 | 673,342 | 52.2% | 27.0% | 0.925 | 0.795 | 2,423,723 | 2,036,850 | 97.1%  | 52.2% | 1.860  | 1.936   |
| Qatar                        | 2,228,738 | 93,322    | -       | 4.2%  | 0.0%  | 1.807 |       | 2,108,786 | -         | 94.6%  | 4.2%  | 22.597 |         |
| Botswana                     | 2,189,399 | 1,181,943 | 796,135 | 54.0% | 36.4% | 0.996 | 0.642 | 2,158,948 | 2,098,935 | 98.6%  | 54.0% | 1.827  | 1.485   |
| Macedonia                    | 2,108,556 | 232,900   | 242,807 | 11.0% | 11.5% | 0.235 | 0.199 | 2,088,409 | 2,103,366 | 99.0%  | 11.0% | 8.967  | 0.959   |
| Gambia                       | 1,997,898 | 205,183   | 27,520  | 10.3% | 1.4%  | 0.381 | 0.120 | 1,918,208 | 1,552,235 | 96.0%  | 10.3% | 9.349  | 7.456   |
| Slovenia                     | 1,987,022 | 562,328   | 632,161 | 28.3% | 31.8% | 0.494 | 0.449 | 1,984,832 | 1,984,417 | 99.9%  | 28.3% | 3.530  | 0.890   |
| Lesotho                      | 1,953,018 | 702,643   | 16,581  | 36.0% | 0.8%  | 0.566 | 0.206 | 1,934,752 | 824,693   | 99.1%  | 36.0% | 2.754  | 42.376  |
| Latvia                       | 1,933,565 | 550,716   | 488,407 | 28.5% | 25.3% | 0.491 | 0.380 | 1,931,377 | 1,917,314 | 99.9%  | 28.5% | 3.507  | 1.128   |
| Kosovo                       | 1,890,703 | 157,436   | 202,081 | 8.3%  | 10.7% | 0.232 | 0.219 | 1,883,698 | 1,890,703 | 99.6%  | 8.3%  | 11.965 | 0.779   |
| Guinea-Bissau                | 1,746,002 | 661,910   | 194,476 | 37.9% | 11.1% | 0.668 | 0.290 | 1,661,447 | 1,221,221 | 95.2%  | 37.9% | 2.510  | 3.404   |
| Gabon                        | 1,738,438 | 837,197   | 412,298 | 48.2% | 23.7% | 0.729 | 0.253 | 1,672,469 | 1,700,572 | 96.2%  | 48.2% | 1.998  | 2.031   |
| eSwatini                     | 1,456,471 | 521,795   | 359,320 | 35.8% | 24.7% | 0.678 | 0.539 | 1,454,833 | 1,446,994 | 99.9%  | 35.8% | 2.788  | 1.452   |
| Mauritius                    | 1,326,444 | 278,406   | -       | 21.0% | 0.0%  | 1.123 |       | 1,268,232 | -         | 95.6%  | 21.0% | 4.555  |         |
| East Timor                   | 1,255,920 | 129,202   | 63,789  | 10.3% | 5.1%  | 0.860 | 0.399 | 1,075,754 | 933,269   | 85.7%  | 10.3% | 8.326  | 2.025   |
| Estonia                      | 1,221,733 | 442,504   | 293,109 | 36.2% | 24.0% | 0.626 | 0.408 | 1,214,456 | 1,199,253 | 99.4%  | 36.2% | 2.745  | 1.510   |
| Trinidad and Tobago          | 1,189,509 | 464,267   | 188,626 | 39.0% | 15.9% | 0.673 | 0.228 | 1,181,365 | 1,163,757 | 99.3%  | 39.0% | 2.545  | 2.461   |
| Bahrain                      | 1,038,211 | 295,148   | 524     | 28.4% | 0.1%  | 1.324 | 0.075 | 1,025,903 | 847,945   | 98.8%  | 28.4% | 3.476  | 563.260 |
| Bhutan                       | 870,394   | 547,289   | 587,242 | 62.9% | 67.5% | 0.887 | 0.737 | 863,279   | 870,153   | 99.2%  | 62.9% | 1.577  | 0.932   |
| Djibouti                     | 821,637   | 339,968   | 4,794   | 41.4% | 0.6%  | 6.499 | 0.220 | 691,391   | 22,949    | 84.1%  | 41.4% | 2.034  | 70.915  |
| Fiji                         | 813,134   | 416,920   | 61,601  | 51.3% | 7.6%  | 0.843 | 0.466 | 764,013   | 565,666   | 94.0%  | 51.3% | 1.833  | 6.768   |
| Guyana                       | 716,848   | 369,757   | 219,607 | 51.6% | 30.6% | 1.267 | 0.313 | 703,511   | 701,780   | 98.1%  | 51.6% | 1.903  | 1.684   |
| Cyprus                       | 700,731   | 96,551    | 2,299   | 13.8% | 0.3%  | 0.304 | 0.049 | 676,970   | 462,343   | 96.6%  | 13.8% | 7.012  | 41.997  |
| Equatorial Guinea            | 680,451   | 440,111   | 248,675 | 64.7% | 36.5% | 0.900 | 0.410 | 646,274   | 672,947   | 95.0%  | 64.7% | 1.468  | 1.770   |
| Comoros                      | 678,746   | 417,477   | -       | 61.5% | 0.0%  | 2.866 |       | 583,383   | -         | 86.0%  | 61.5% | 1.397  |         |
| Montenegro                   | 606,998   | 219,118   | 202,229 | 36.1% | 33.3% | 0.560 | 0.413 | 604,210   | 605,488   | 99.5%  | 36.1% | 2.757  | 1.084   |
| Luxembourg                   | 596,003   | 158,107   | 187,193 | 26.5% | 31.4% | 0.531 | 0.550 | 591,096   | 595,858   | 99.2%  | 26.5% | 3.739  | 0.845   |
| Suriname                     | 584,869   | 235,434   | 128,597 | 40.3% | 22.0% | 0.954 | 0.225 | 578,641   | 582,624   | 98.9%  | 40.3% | 2.458  | 1.831   |
| Macao S.A.R                  | 564,113   | 396,532   | 333,915 | 70.3% | 59.2% | 1.406 | 2.960 | 555,588   | 484,778   | 98.5%  | 70.3% | 1.401  | 1.188   |
| Cabo Verde                   | 452,747   | 151,128   | -       | 33.4% | 0.0%  | 3.245 |       | 328,105   | -         | 72.5%  | 33.4% | 2.171  |         |
| Brunei                       | 419,129   | 125,571   | 76,165  | 30.0% | 18.2% | 0.447 | 0.213 | 413,190   | 417,104   | 98.6%  | 30.0% | 3.290  | 1.649   |
| Malta                        | 409,763   | 48,602    | 558     | 11.9% | 0.1%  | 0.873 | 0.055 | 401,267   | 395,230   | 97.9%  | 11.9% | 8.256  | 87.100  |
| Solomon Islands              | 400,839   | 287,013   | 205,198 | 71.6% | 51.2% | 1.447 | 0.616 | 348,275   | 339,105   | 86.9%  | 71.6% | 1.213  | 1.399   |
| Northern Cyprus              | 383,550   | 65,548    | 217     | 17.1% | 0.1%  | 0.549 | 0.047 | 372,626   | 286,893   | 97.2%  | 17.1% | 5.685  | 302.065 |
| Belize                       | 338,621   | 154,697   | 107,874 | 45.7% | 31.9% | 0.759 | 0.400 | 315,679   | 306,368   | 93.2%  | 45.7% | 2.041  | 1.434   |
| Iceland                      | 306,970   | 238,873   | 2       | 77.8% | 0.0%  | 3.586 | 0.055 | 274,901   | 29        | 89.6%  | 77.8% | 1.151  | #####   |
| The Bahamas                  | 289,725   | 146,320   | 14,240  | 50.5% | 4.9%  | 0.950 | 0.095 | 283,726   | 233,410   | 97.9%  | 50.5% | 1.939  | 10.275  |
| Barbados                     | 247,885   | 86,227    | 4,957   | 34.8% | 2.0%  | 1.095 | 0.238 | 241,653   | 228,013   | 97.5%  | 34.8% | 2.803  | 17.395  |
| New Caledonia                | 243,095   | 126,420   | 15,399  | 52.0% | 6.3%  | 1.359 | 0.473 | 228,874   | 161,268   | 94.2%  | 52.0% | 1.810  | 8.210   |
| Vanuatu                      | 216,480   | 185,630   | 50,705  | 85.7% | 23.4% | 1.773 | 0.358 | 204,728   | 170,441   | 94.6%  | 85.7% | 1.103  | 3.661   |
| French Polynesia             | 203,189   | 109,532   | -       | 53.9% | 0.0%  | 2.800 |       | 179,927   | -         | 88.6%  | 53.9% | 1.643  |         |
| São Tomé and Príncipe        | 188,186   | 55,261    | -       | 29.4% | 0.0%  | 2.048 |       | 183,842   | -         | 97.7%  | 29.4% | 3.327  |         |
| Guam                         | 163,406   | 90,631    | -       | 55.5% | 0.0%  | 1.806 |       | 161,052   | -         | 98.6%  | 55.5% | 1.777  |         |
| Saint Lucia                  | 157,880   | 118,161   | 62,153  | 74.8% | 39.4% | 1.081 | 0.480 | 156,947   | 157,312   | 99.4%  | 74.8% | 1.328  | 1.901   |
| Maldives                     | 157,785   | 155,935   | -       | 98.8% | 0.0%  | 1.186 |       | -         | -         | 0.0%   | 98.8% | -      |         |
| Curaçao                      | 147,442   | 59,581    | 164     | 40.4% | 0.1%  | 0.794 | 0.021 | 147,429   | 6,455     | 100.0% | 40.4% | 2.474  | 363.299 |
| Samoa                        | 146,519   | 67,695    | -       | 46.2% | 0.0%  | 5.010 |       | 131,994   | -         | 90.1%  | 46.2% | 1.950  |         |
| Cyprus No Mans Area          | 120,703   | 7,102     | -       | 5.9%  | 0.0%  | 0.183 |       | 120,703   | 114,413   | 100.0% | 5.9%  | 16.996 |         |
| United States Virgin Islands | 104,176   | 74,879    | 15,982  | 71.9% | 15.3% | 0.938 | 0.476 | 102,926   | 96,306    | 98.8%  | 71.9% | 1.375  | 4.685   |
| Grenada                      | 95,383    | 84,389    | 65,800  | 88.5% | 69.0% | 1.132 | 0.769 | 94,567    | 92,842    | 99.1%  | 88.5% | 1.121  | 1.283   |
| Seychelles                   | 88,552    | 40,430    | -       | 45.7% | 0.0%  | 0.711 |       | 76,634    | -         | 86.5%  | 45.7% | 1.895  |         |

|                                  |        |        |        |        |       |        |       |        |        |        |        |        |        |
|----------------------------------|--------|--------|--------|--------|-------|--------|-------|--------|--------|--------|--------|--------|--------|
| Antigua and Barbuda              | 85,449 | 74,608 | 1,042  | 87.3%  | 1.2%  | 1.113  | 0.067 | 85,417 | 84,898 | 100.0% | 87.3%  | 1.145  | 71.601 |
| Isle of Man                      | 85,235 | 21,721 | 33,092 | 25.5%  | 38.8% | 0.552  | 0.498 | 71,053 | 83,612 | 83.4%  | 25.5%  | 3.271  | 0.656  |
| Andorra                          | 84,995 | 68,752 | 70,641 | 80.9%  | 83.1% | 0.985  | 0.887 | 84,995 | 84,995 | 100.0% | 80.9%  | 1.236  | 0.973  |
| Aruba                            | 80,565 | 52,649 | -      | 65.3%  | 0.0%  | 1.081  |       | 80,562 | -      | 100.0% | 65.3%  | 1.530  |        |
| Saint Vincent and the Grenadines | 71,274 | 60,619 | 27,840 | 85.1%  | 39.1% | 1.423  | 0.485 | 71,025 | 68,043 | 99.7%  | 85.1%  | 1.172  | 2.177  |
| Bermuda                          | 63,562 | 48,869 | -      | 76.9%  | 0.0%  | 1.089  |       | -      | -      | 0.0%   | 76.9%  | -      |        |
| Guernsey                         | 61,621 | 31,938 | -      | 51.8%  | 0.0%  | 1.166  |       | 35,840 | -      | 58.2%  | 51.8%  | 1.122  |        |
| Jersey                           | 60,305 | 3,497  | 933    | 5.8%   | 1.5%  | 0.265  | 0.495 | 50,871 | 50,221 | 84.4%  | 5.8%   | 14.547 | 3.748  |
| Dominica                         | 59,013 | 54,652 | 33,176 | 92.6%  | 56.2% | 1.057  | 0.611 | 58,490 | 58,571 | 99.1%  | 92.6%  | 1.070  | 1.647  |
| Cayman Islands                   | 57,107 | 56,103 | 10,551 | 98.2%  | 18.5% | 1.127  | 0.328 | 56,979 | 37,326 | 99.8%  | 98.2%  | 1.016  | 5.317  |
| Tonga                            | 51,480 | 21,039 | -      | 40.9%  | 0.0%  | 1.061  |       | 45,983 | -      | 89.3%  | 40.9%  | 2.186  |        |
| Northern Mariana Islands         | 50,350 | 37,918 | -      | 75.3%  | 0.0%  | 3.523  |       | 47,492 | -      | 94.3%  | 75.3%  | 1.252  |        |
| American Samoa                   | 45,555 | 16,809 | -      | 36.9%  | 0.0%  | 1.513  |       | 40,739 | -      | 89.4%  | 36.9%  | 2.424  |        |
| Turks and Caicos Islands         | 44,265 | 27,501 | 18,297 | 62.1%  | 41.3% | 0.972  | 0.950 | 40,358 | 41,251 | 91.2%  | 62.1%  | 1.468  | 1.503  |
| Federated States of Micronesia   | 41,989 | 29,832 | -      | 71.0%  | 0.0%  | 2.409  |       | 38,077 | -      | 90.7%  | 71.0%  | 1.276  |        |
| Saint Martin                     | 41,301 | 35,163 | 711    | 85.1%  | 1.7%  | 0.901  | 0.103 | 41,050 | 23,182 | 99.4%  | 85.1%  | 1.167  | 49.456 |
| Western Sahara                   | 40,247 | 852    | -      | 2.1%   | 0.0%  | 96.003 |       | 1,727  | -      | 4.3%   | 2.1%   | 2.027  |        |
| Monaco                           | 40,195 | 32,366 | -      | 80.5%  | 0.0%  | 1.610  |       | 40,195 | -      | 100.0% | 80.5%  | 1.242  |        |
| Saint Kitts and Nevis            | 39,936 | 35,673 | 740    | 89.3%  | 1.9%  | 1.030  | 0.070 | 39,855 | 39,855 | 99.8%  | 89.3%  | 1.117  | 48.207 |
| Faroe Islands                    | 37,249 | 24,819 | -      | 66.6%  | 0.0%  | 1.859  |       | 32,659 | -      | 87.7%  | 66.6%  | 1.316  |        |
| Liechtenstein                    | 34,641 | 12,587 | 14,603 | 36.3%  | 42.2% | 0.640  | 0.650 | 34,640 | 34,641 | 100.0% | 36.3%  | 2.752  | 0.862  |
| British Virgin Islands           | 31,118 | 31,108 | 6,413  | 100.0% | 20.6% | 1.151  | 0.392 | 30,766 | 27,454 | 98.9%  | 100.0% | 0.989  | 4.851  |
| San Marino                       | 30,139 | -      | -      | 0.0%   | 0.0%  |        |       | 2,020  | 2,020  | 6.7%   | 0.0%   |        |        |
| Kiribati                         | 26,147 | 22,089 | -      | 84.5%  | 0.0%  | 1.569  |       | 15,244 | -      | 58.3%  | 84.5%  | 0.690  |        |
| Aland                            | 24,202 | 16,354 | 910    | 67.6%  | 3.8%  | 1.509  | 0.432 | 16,923 | 16,272 | 69.9%  | 67.6%  | 1.035  | 17.971 |
| Sint Maarten                     | 22,221 | 19,133 | 1,779  | 86.1%  | 8.0%  | 1.033  | 0.480 | 22,221 | 12,257 | 100.0% | 86.1%  | 1.161  | 10.755 |
| Dhekelia Sovereign Base Area     | 16,445 | 1,244  | -      | 7.6%   | 0.0%  | 0.454  |       | 14,582 | 14     | 88.7%  | 7.6%   | 11.722 |        |
| Greenland                        | 16,269 | 8,845  | -      | 54.4%  | 0.0%  |        |       | 10,579 | -      | 65.0%  | 54.4%  | 1.196  |        |
| Palau                            | 14,500 | 12,462 | -      | 85.9%  | 0.0%  | 2.755  |       | 13,545 | -      | 93.4%  | 85.9%  | 1.087  |        |
| Anguilla                         | 14,113 | 12,681 | -      | 89.9%  | 0.0%  | 1.219  |       | 13,168 | -      | 93.3%  | 89.9%  | 1.038  |        |
| Gibraltar                        | 9,176  | 9,176  | -      | 100.0% | 0.0%  | 1.000  |       | 9,176  | -      | 100.0% | 100.0% | 1.000  |        |
| Wallis and Futuna                | 9,060  | 5,431  | -      | 59.9%  | 0.0%  | 1.073  |       | 7,123  | -      | 78.6%  | 59.9%  | 1.312  |        |
| Nauru                            | 7,641  | 6,939  | -      | 90.8%  | 0.0%  | 1.211  |       | 7,436  | -      | 97.3%  | 90.8%  | 1.072  |        |
| Saint Helena                     | 6,998  | -      | -      | 0.0%   | 0.0%  |        |       | -      | -      | 0.0%   | 0.0%   |        |        |
| Saint Barthlemy                  | 6,772  | 6,772  | -      | 100.0% | 0.0%  | 1.000  |       | 6,772  | -      | 100.0% | 100.0% | 1.000  |        |
| Cook Islands                     | 5,987  | 4,798  | -      | 80.1%  | 0.0%  | 3.424  |       | 3,753  | -      | 62.7%  | 80.1%  | 0.782  |        |
| Saint Pierre and Miquelon        | 5,456  | 4,827  | 109    | 88.5%  | 2.0%  | 4.954  | 0.093 | 5,404  | 127    | 99.0%  | 88.5%  | 1.120  | 44.284 |
| Akrotiri Sovereign Base Area     | 5,389  | 1,359  | 187    | 25.2%  | 3.5%  | 1.093  | 0.301 | 4,663  | 3,234  | 86.5%  | 25.2%  | 3.431  | 7.267  |
| Montserrat                       | 4,247  | 3,877  | 835    | 91.3%  | 19.7% | 1.521  | 0.328 | 4,245  | 4,247  | 100.0% | 91.3%  | 1.095  | 4.643  |
| Marshall Islands                 | 4,024  | 1,755  | -      | 43.6%  | 0.0%  | 0.463  |       | 3,453  | -      | 85.8%  | 43.6%  | 1.968  |        |
| Falkland Islands                 | 2,816  | 33     | -      | 1.2%   | 0.0%  | 0.185  |       | 2,748  | -      | 97.6%  | 1.2%   | 83.273 |        |
| Norfolk Island                   | 2,180  | 88     | -      | 4.0%   | 0.0%  | 0.323  |       | 1,780  | -      | 81.7%  | 4.0%   | 20.227 |        |
| Niue                             | 1,071  | 728    | -      | 68.0%  | 0.0%  | 4.078  |       | 1,026  | -      | 95.8%  | 68.0%  | 1.409  |        |
| Vatican                          | 1,000  | -      | -      | 0.0%   | 0.0%  |        |       | 1,000  | 1,000  | 100.0% | 0.0%   |        |        |
| Tuvalu                           | 971    | 564    | -      | 58.1%  | 0.0%  | 0.968  |       | 917    | -      | 94.4%  | 58.1%  | 1.626  |        |
| Siachen Glacier                  | 239    | -      | -      | 0.0%   | 0.0%  |        | 0.000 | -      | 239    | 0.0%   | 0.0%   |        |        |
| Indian Ocean Territories         | 217    | 217    | -      | 100.0% | 0.0%  | 2.364  |       | 217    | -      | 100.0% | 100.0% | 1.000  |        |
| US Naval Base Guantanamo Bay     | 175    | 28     | 151    | 16.0%  | 86.3% | 0.427  | 0.986 | 127    | 175    | 72.6%  | 16.0%  | 4.536  | 0.185  |
| Spratly Islands                  | 69     | 32     | -      | 46.4%  | 0.0%  | 0.464  |       | -      | -      | 0.0%   | 46.4%  | -      |        |
| Pitcairn Islands                 | 15     | -      | -      | 0.0%   | 0.0%  |        |       | -      | -      | 0.0%   | 0.0%   |        |        |

|                                      |    |   |   |      |      |   |   |      |      |
|--------------------------------------|----|---|---|------|------|---|---|------|------|
| United States Minor Outlying Islands | 15 | - | - | 0.0% | 0.0% | - | - | 0.0% | 0.0% |
| French Southern and Antarctic Lands  | -  | - | - |      |      | - | - | 0.0% | 0.0% |
| South Georgia and the Islands        | -  | - | - |      |      | - | - | 0.0% | 0.0% |
| Heard Island and McDonald Islands    | -  | - | - |      |      | - | - | 0.0% | 0.0% |
| British Indian Ocean Territory       | -  | - | - |      |      | - | - | 0.0% | 0.0% |
| Clipperton Island                    | -  | - | - |      |      | - | - | 0.0% | 0.0% |
| Scarborough Reef                     | -  | - | - |      |      | - | - | 0.0% | 0.0% |
| Serranilla Bank                      | -  | - | - |      |      | - | - | 0.0% | 0.0% |
| Coral Sea Islands                    | -  | - | - |      |      | - | - | 0.0% | 0.0% |
| Bajo Nuevo Bank (Petrel Is.)         | -  | - | - |      |      | - | - | 0.0% | 0.0% |

**SI Table 3. Overlap of critical natural assets with biodiversity.**

|                                                |                 | Number of<br>species | Percent of<br>species within<br>LCNA | Percent of<br>species<br>within<br>GCNA |
|------------------------------------------------|-----------------|----------------------|--------------------------------------|-----------------------------------------|
| Global totals                                  | birds           | 13077                | 73%                                  | 73%                                     |
|                                                | mammals         | 5102                 | 66%                                  | 70%                                     |
|                                                | reptiles        | 4031                 | 41%                                  | 41%                                     |
|                                                | amphibians      | 5967                 | 41%                                  | 46%                                     |
|                                                | all vertebrates | 28177                | 60%                                  | 62%                                     |
| Endemic species (AOH 100%<br>within country)   | birds           | 3435                 | 45%                                  | 50%                                     |
|                                                | mammals         | 2027                 | 41%                                  | 47%                                     |
|                                                | reptiles        | 2484                 | 26%                                  | 26%                                     |
|                                                | amphibians      | 4033                 | 26%                                  | 30%                                     |
|                                                | all vertebrates | 11979                | 34%                                  | 37%                                     |
| Species whose AOH falls >80%<br>within country | birds           | 5484                 | 55%                                  | 58%                                     |
|                                                | mammals         | 2796                 | 50%                                  | 54%                                     |
|                                                | reptiles        | 3048                 | 30%                                  | 31%                                     |
|                                                | amphibians      | 4725                 | 30%                                  | 35%                                     |
|                                                | all vertebrates | 16053                | 42%                                  | 45%                                     |
| Species whose AOH falls >50%<br>within country | birds           | 9638                 | 61%                                  | 65%                                     |
|                                                | mammals         | 4160                 | 57%                                  | 61%                                     |
|                                                | reptiles        | 3748                 | 34%                                  | 36%                                     |
|                                                | amphibians      | 5583                 | 34%                                  | 39%                                     |
|                                                | all vertebrates | 23129                | 50%                                  | 53%                                     |

| Country (ranked by number of<br>endemic + majority AOH<br>species) | # Endemic<br>species (whose<br>area of habitat<br>(AOH) is entirely<br>contained within<br>country) | Percent of<br>endemic<br>species within<br>critical natural<br>assets for local<br>NCP (LCNA) | Percent of<br>endemic species<br>within critical<br>natural assets<br>for global NCP<br>(GCNA) | # Species<br>whose AOH<br>falls >50%<br>within<br>country | Percent of<br>>50% AOH<br>species<br>within<br>LCNA | Percent of<br>>50% AOH<br>species<br>within<br>GCNA |
|--------------------------------------------------------------------|-----------------------------------------------------------------------------------------------------|-----------------------------------------------------------------------------------------------|------------------------------------------------------------------------------------------------|-----------------------------------------------------------|-----------------------------------------------------|-----------------------------------------------------|
| Global                                                             | 11979                                                                                               | 34%                                                                                           | 37%                                                                                            | 23129                                                     | 50%                                                 | 53%                                                 |
| Brazil                                                             | 976                                                                                                 | 61%                                                                                           | 62%                                                                                            | 2360                                                      | 82%                                                 | 83%                                                 |
| Indonesia                                                          | 982                                                                                                 | 31%                                                                                           | 58%                                                                                            | 1729                                                      | 51%                                                 | 71%                                                 |
| Mexico                                                             | 880                                                                                                 | 40%                                                                                           | 25%                                                                                            | 1433                                                      | 55%                                                 | 42%                                                 |
| Australia                                                          | 960                                                                                                 | 54%                                                                                           | 48%                                                                                            | 1150                                                      | 57%                                                 | 51%                                                 |
| Madagascar                                                         | 931                                                                                                 | 46%                                                                                           | 54%                                                                                            | 965                                                       | 47%                                                 | 55%                                                 |
| United States of America                                           | 444                                                                                                 | 55%                                                                                           | 64%                                                                                            | 1208                                                      | 69%                                                 | 76%                                                 |
| Colombia                                                           | 485                                                                                                 | 25%                                                                                           | 40%                                                                                            | 962                                                       | 48%                                                 | 63%                                                 |
| China                                                              | 362                                                                                                 | 52%                                                                                           | 49%                                                                                            | 1063                                                      | 66%                                                 | 68%                                                 |
| Peru                                                               | 449                                                                                                 | 35%                                                                                           | 35%                                                                                            | 921                                                       | 57%                                                 | 54%                                                 |
| India                                                              | 470                                                                                                 | 27%                                                                                           | 26%                                                                                            | 877                                                       | 40%                                                 | 38%                                                 |
| Philippines                                                        | 596                                                                                                 | 31%                                                                                           | 52%                                                                                            | 619                                                       | 32%                                                 | 52%                                                 |
| Papua New Guinea                                                   | 405                                                                                                 | 21%                                                                                           | 55%                                                                                            | 785                                                       | 47%                                                 | 71%                                                 |
| Argentina                                                          | 252                                                                                                 | 29%                                                                                           | 8%                                                                                             | 568                                                       | 56%                                                 | 32%                                                 |
| Venezuela                                                          | 267                                                                                                 | 24%                                                                                           | 32%                                                                                            | 480                                                       | 43%                                                 | 51%                                                 |
| Ecuador                                                            | 248                                                                                                 | 17%                                                                                           | 28%                                                                                            | 497                                                       | 28%                                                 | 47%                                                 |
| Democratic Republic of the Congo                                   | 92                                                                                                  | 33%                                                                                           | 41%                                                                                            | 426                                                       | 72%                                                 | 77%                                                 |
| United Republic of Tanzania                                        | 160                                                                                                 | 4%                                                                                            | 10%                                                                                            | 285                                                       | 25%                                                 | 34%                                                 |
| Russia                                                             | 46                                                                                                  | 9%                                                                                            | 20%                                                                                            | 369                                                       | 62%                                                 | 76%                                                 |
| South Africa                                                       | 111                                                                                                 | 58%                                                                                           | 1%                                                                                             | 292                                                       | 77%                                                 | 16%                                                 |
| Malaysia                                                           | 109                                                                                                 | 16%                                                                                           | 30%                                                                                            | 291                                                       | 44%                                                 | 64%                                                 |

|                                |     |     |     |     |     |     |
|--------------------------------|-----|-----|-----|-----|-----|-----|
| Bolivia                        | 102 | 38% | 55% | 264 | 61% | 74% |
| Chile                          | 103 | 31% | 14% | 245 | 36% | 36% |
| Japan                          | 132 | 39% | 30% | 180 | 44% | 36% |
| Vietnam                        | 89  | 6%  | 20% | 200 | 22% | 47% |
| Sri Lanka                      | 141 | 30% | 8%  | 146 | 30% | 8%  |
| Costa Rica                     | 61  | 5%  | 5%  | 207 | 7%  | 20% |
| Cuba                           | 111 | 29% | 0%  | 143 | 34% | 0%  |
| Canada                         | 9   | 22% | 22% | 231 | 50% | 74% |
| Ethiopia                       | 75  | 21% | 31% | 164 | 54% | 59% |
| Cameroon                       | 76  | 14% | 18% | 161 | 41% | 45% |
| New Caledonia                  | 108 | 0%  | 0%  | 120 | 0%  | 0%  |
| Solomon Islands                | 86  | 15% | 43% | 129 | 12% | 57% |
| New Zealand                    | 92  | 18% | 30% | 112 | 21% | 28% |
| Panama                         | 63  | 10% | 13% | 141 | 16% | 31% |
| Guatemala                      | 58  | 21% | 26% | 122 | 30% | 34% |
| Kenya                          | 49  | 12% | 18% | 125 | 37% | 49% |
| Myanmar                        | 43  | 9%  | 35% | 130 | 45% | 67% |
| Honduras                       | 66  | 2%  | 6%  | 97  | 12% | 12% |
| Dominican Republic             | 33  | 3%  | 6%  | 119 | 18% | 6%  |
| Iran                           | 42  | 2%  | 2%  | 108 | 6%  | 12% |
| Taiwan                         | 67  | 40% | 4%  | 76  | 38% | 4%  |
| Jamaica                        | 71  | 37% | 0%  | 71  | 37% | 0%  |
| Spain                          | 36  | 6%  | 8%  | 90  | 42% | 38% |
| Angola                         | 38  | 50% | 50% | 84  | 69% | 69% |
| Turkey                         | 32  | 3%  | 3%  | 83  | 27% | 33% |
| Yemen                          | 38  | 0%  | 0%  | 72  | 13% | 0%  |
| France                         | 34  | 0%  | 6%  | 72  | 14% | 25% |
| Fiji                           | 45  | 49% | 0%  | 60  | 48% | 0%  |
| Thailand                       | 29  | 0%  | 14% | 72  | 7%  | 28% |
| Puerto Rico                    | 40  | 38% | 0%  | 58  | 33% | 0%  |
| Haiti                          | 38  | 0%  | 0%  | 56  | 4%  | 0%  |
| São Tomé and Príncipe          | 44  | 0%  | 0%  | 45  | 0%  | 0%  |
| Mozambique                     | 12  | 0%  | 0%  | 67  | 58% | 63% |
| Morocco                        | 25  | 12% | 4%  | 50  | 14% | 2%  |
| Pakistan                       | 9   | 11% | 22% | 59  | 22% | 22% |
| Liberia                        |     |     |     | 68  | 69% | 96% |
| Guyana                         | 25  | 4%  | 16% | 40  | 5%  | 33% |
| Italy                          | 21  | 24% | 19% | 44  | 30% | 30% |
| Namibia                        | 11  | 27% | 0%  | 53  | 49% | 32% |
| Comoros                        | 28  | 0%  | 0%  | 35  | 0%  | 0%  |
| Nepal                          | 14  | 21% | 36% | 47  | 36% | 40% |
| Kazakhstan                     | 6   | 50% | 33% | 54  | 74% | 76% |
| Nigeria                        | 14  | 0%  | 7%  | 42  | 24% | 31% |
| Seychelles                     | 26  | 0%  | 0%  | 26  | 0%  | 0%  |
| Laos                           | 9   | 33% | 56% | 43  | 47% | 58% |
| Federated States of Micronesia | 24  | 0%  | 0%  | 27  | 0%  | 0%  |
| Algeria                        | 7   | 14% | 0%  | 43  | 12% | 0%  |
| Somalia                        | 11  | 45% | 36% | 38  | 63% | 55% |
| Zambia                         | 11  | 36% | 0%  | 36  | 58% | 0%  |
| Cambodia                       | 7   | 0%  | 0%  | 40  | 25% | 48% |
| Nicaragua                      | 6   | 0%  | 0%  | 41  | 15% | 44% |
| Cabo Verde                     | 22  | 0%  | 0%  | 23  | 0%  | 0%  |
| Vanuatu                        | 19  | 0%  | 53% | 26  | 0%  | 54% |
| Trinidad and Tobago            | 18  | 0%  | 11% | 21  | 0%  | 14% |
| Saudi Arabia                   | 4   | 0%  | 0%  | 35  | 0%  | 0%  |

|                                    |    |     |     |    |     |     |
|------------------------------------|----|-----|-----|----|-----|-----|
| Palau                              | 17 | 0%  | 0%  | 20 | 0%  | 0%  |
| The Bahamas                        | 16 | 6%  | 0%  | 21 | 5%  | 0%  |
| Greece                             | 13 | 8%  | 15% | 24 | 8%  | 13% |
| French Polynesia                   | 16 | 0%  | 0%  | 20 | 0%  | 0%  |
| Gabon                              | 8  | 13% | 25% | 28 | 68% | 71% |
| Ivory Coast                        | 8  | 0%  | 13% | 28 | 4%  | 18% |
| Uganda                             | 7  | 0%  | 14% | 28 | 0%  | 4%  |
| Egypt                              | 13 | 0%  | 0%  | 21 | 0%  | 0%  |
| Ghana                              | 8  | 0%  | 0%  | 24 | 8%  | 21% |
| Mongolia                           | 1  | 0%  | 0%  | 31 | 39% | 48% |
| Oman                               | 9  | 0%  | 0%  | 20 | 0%  | 0%  |
| Sudan                              | 5  | 20% | 0%  | 23 | 52% | 35% |
| French Southern and Antarctic Lanc | 4  | 0%  | 0%  | 23 | 0%  | 0%  |
| Samoa                              | 10 | 0%  | 0%  | 16 | 0%  | 0%  |
| Malawi                             | 9  | 0%  | 0%  | 16 | 0%  | 0%  |
| Uruguay                            | 6  | 0%  | 0%  | 19 | 42% | 0%  |
| Guinea                             | 8  | 0%  | 0%  | 16 | 6%  | 6%  |
| Falkland Islands                   | 7  | 0%  | 0%  | 17 | 0%  | 0%  |
| Zimbabwe                           | 3  | 0%  | 0%  | 21 | 33% | 0%  |
| Afghanistan                        | 3  | 33% | 33% | 20 | 45% | 55% |
| Somaliland                         | 6  | 67% | 0%  | 14 | 64% | 0%  |
| Paraguay                           | 3  | 33% | 33% | 17 | 59% | 76% |
| Mali                               | 2  | 50% | 0%  | 16 | 75% | 0%  |
| Cayman Islands                     | 8  | 0%  | 0%  | 8  | 0%  | 0%  |
| Mauritius                          | 8  | 0%  | 0%  | 8  | 0%  | 0%  |
| South Korea                        | 5  | 0%  | 0%  | 11 | 45% | 0%  |
| Equatorial Guinea                  | 7  | 0%  | 0%  | 8  | 0%  | 0%  |
| Saint Vincent and the Grenadines   | 7  | 0%  | 0%  | 8  | 0%  | 0%  |
| Suriname                           | 5  | 20% | 40% | 10 | 60% | 70% |
| Senegal                            | 2  | 0%  | 0%  | 13 | 23% | 0%  |
| East Timor                         | 1  | 0%  | 0%  | 14 | 0%  | 0%  |
| Indian Ocean Territories           | 7  | 0%  | 0%  | 7  | 0%  | 0%  |
| Northern Mariana Islands           | 6  | 0%  | 0%  | 8  | 0%  | 0%  |
| Turkmenistan                       | 2  | 50% | 50% | 12 | 8%  | 8%  |
| Iraq                               | 1  | 0%  | 0%  | 13 | 0%  | 0%  |
| Portugal                           | 6  | 0%  | 0%  | 7  | 0%  | 0%  |
| Grenada                            | 5  | 0%  | 0%  | 7  | 0%  | 0%  |
| Central African Republic           | 4  | 25% | 25% | 8  | 63% | 63% |
| Belize                             | 2  | 0%  | 50% | 10 | 0%  | 20% |
| United Kingdom                     | 2  | 50% | 50% | 10 | 20% | 30% |
| South Sudan                        | 1  | 0%  | 0%  | 11 | 73% | 91% |
| Republic of the Congo              | 4  | 25% | 25% | 7  | 43% | 57% |
| Chad                               | 3  | 0%  | 0%  | 8  | 25% | 25% |
| Dominica                           | 5  | 0%  | 0%  | 5  | 0%  | 0%  |
| Montserrat                         | 5  | 0%  | 0%  | 5  | 0%  | 0%  |
| Norfolk Island                     | 5  | 0%  | 0%  | 5  | 0%  | 0%  |
| Saint Lucia                        | 5  | 0%  | 0%  | 5  | 0%  | 0%  |
| Sierra Leone                       | 4  | 0%  | 0%  | 6  | 0%  | 0%  |
| Libya                              | 3  | 0%  | 0%  | 7  | 0%  | 0%  |
| Mauritania                         | 2  | 0%  | 0%  | 7  | 29% | 0%  |
| Norway                             | 2  | 0%  | 0%  | 7  | 14% | 14% |
| Armenia                            | 3  | 0%  | 0%  | 5  | 0%  | 0%  |
| Hong Kong S.A.R.                   | 3  | 0%  | 0%  | 5  | 0%  | 0%  |
| United States Virgin Islands       | 3  | 0%  | 0%  | 5  | 0%  | 0%  |
| Armenia                            | 3  | 0%  | 0%  | 5  | 0%  | 0%  |

|                               |   |    |    |   |      |      |
|-------------------------------|---|----|----|---|------|------|
| Rwanda                        | 2 | 0% | 0% | 6 | 0%   | 0%   |
| Syria                         | 2 | 0% | 0% | 6 | 0%   | 0%   |
| Cyprus                        | 1 | 0% | 0% | 7 | 0%   | 0%   |
| Georgia                       | 1 | 0% | 0% | 7 | 0%   | 14%  |
| Bhutan                        |   |    |    | 8 | 38%  | 38%  |
| Antigua and Barbuda           | 3 | 0% | 0% | 4 | 0%   | 0%   |
| Botswana                      | 1 | 0% | 0% | 6 | 83%  | 83%  |
| Israel                        | 1 | 0% | 0% | 6 | 0%   | 0%   |
| Benin                         | 3 | 0% | 0% | 3 | 0%   | 0%   |
| Cook Islands                  | 3 | 0% | 0% | 3 | 0%   | 0%   |
| Singapore                     | 3 | 0% | 0% | 3 | 0%   | 0%   |
| Turks and Caicos Islands      | 3 | 0% | 0% | 3 | 0%   | 0%   |
| Netherlands                   | 2 | 0% | 0% | 4 | 0%   | 0%   |
| Aruba                         | 2 | 0% | 0% | 3 | 0%   | 0%   |
| Burundi                       | 2 | 0% | 0% | 3 | 0%   | 0%   |
| Eritrea                       | 2 | 0% | 0% | 3 | 0%   | 0%   |
| Tunisia                       | 2 | 0% | 0% | 3 | 0%   | 0%   |
| Curaçao                       | 2 | 0% | 0% | 3 | 0%   | 0%   |
| Ukraine                       | 2 | 0% | 0% | 3 | 33%  | 33%  |
| South Georgia and the Islands | 1 | 0% | 0% | 4 | 0%   | 0%   |
| Azerbaijan                    | 1 | 0% | 0% | 4 | 0%   | 0%   |
| Bangladesh                    |   |    |    | 5 | 0%   | 0%   |
| Greenland                     |   |    |    | 5 | 0%   | 0%   |
| Lebanon                       |   |    |    | 5 | 0%   | 0%   |
| British Virgin Islands        | 2 | 0% | 0% | 2 | 0%   | 0%   |
| Saint Helena                  | 2 | 0% | 0% | 2 | 0%   | 0%   |
| Kiribati                      | 1 | 0% | 0% | 3 | 0%   | 0%   |
| Poland                        | 1 | 0% | 0% | 3 | 0%   | 0%   |
| Togo                          | 1 | 0% | 0% | 3 | 0%   | 0%   |
| Saint Kitts and Nevis         | 1 | 0% | 0% | 3 | 0%   | 0%   |
| United Arab Emirates          |   |    |    | 4 | 0%   | 0%   |
| El Salvador                   | 1 | 0% | 0% | 2 | 0%   | 0%   |
| Iceland                       | 1 | 0% | 0% | 2 | 0%   | 0%   |
| Kyrgyzstan                    | 1 | 0% | 0% | 2 | 0%   | 0%   |
| Lesotho                       |   |    |    | 3 | 0%   | 0%   |
| North Korea                   |   |    |    | 3 | 0%   | 0%   |
| Tajikistan                    |   |    |    | 3 | 33%  | 33%  |
| Anguilla                      | 1 | 0% | 0% | 1 | 0%   | 0%   |
| Barbados                      | 1 | 0% | 0% | 1 | 0%   | 0%   |
| Denmark                       | 1 | 0% | 0% | 1 | 0%   | 0%   |
| Nauru                         | 1 | 0% | 0% | 1 | 0%   | 0%   |
| Tonga                         | 1 | 0% | 0% | 1 | 0%   | 0%   |
| Saint Barthelemy              | 1 | 0% | 0% | 1 | 0%   | 0%   |
| Guinea-Bissau                 | 1 | 0% | 0% | 1 | 0%   | 0%   |
| Malta                         | 1 | 0% | 0% | 1 | 0%   | 0%   |
| Niue                          | 1 | 0% | 0% | 1 | 0%   | 0%   |
| Austria                       | 1 | 0% | 0% | 1 | 0%   | 0%   |
| Albania                       |   |    |    | 2 | 0%   | 0%   |
| Ireland                       |   |    |    | 2 | 50%  | 50%  |
| Uzbekistan                    |   |    |    | 2 | 0%   | 0%   |
| Romania                       |   |    |    | 2 | 0%   | 0%   |
| Finland                       |   |    |    | 1 | 100% | 100% |
| Guam                          |   |    |    | 1 | 0%   | 0%   |
| Gambia                        |   |    |    | 1 | 0%   | 0%   |
| Croatia                       |   |    |    | 1 | 0%   | 0%   |

|              |   |      |    |
|--------------|---|------|----|
| Jordan       | 1 | 0%   | 0% |
| Palestine    | 1 | 0%   | 0% |
| Burkina Faso | 1 | 100% | 0% |
| Bulgaria     | 1 | 0%   | 0% |
| Niger        | 1 | 0%   | 0% |



**SI Table 4. Overlap of critical natural assets with cultural diversity.**

| Country (ranked by # languages)  | # Indigenous and Non-Migrant Languages | # languages intersecting critical natural assets for local NCP (LCNA) | # languages intersecting critical natural assets for global NCP (CGCNA) | % of languages on LCNA | % of languages on GCNA |
|----------------------------------|----------------------------------------|-----------------------------------------------------------------------|-------------------------------------------------------------------------|------------------------|------------------------|
| Global                           | 6,474                                  | 6,220                                                                 | 5,976                                                                   | 96.1%                  | 92.3%                  |
| Papua New Guinea                 | 829                                    | 822                                                                   | 796                                                                     | 99.2%                  | 96.0%                  |
| Indonesia                        | 687                                    | 665                                                                   | 655                                                                     | 96.8%                  | 95.3%                  |
| Nigeria                          | 493                                    | 428                                                                   | 431                                                                     | 86.8%                  | 87.4%                  |
| India                            | 408                                    | 400                                                                   | 393                                                                     | 98.0%                  | 96.3%                  |
| Mexico                           | 277                                    | 271                                                                   | 234                                                                     | 97.8%                  | 84.5%                  |
| Cameroon                         | 267                                    | 256                                                                   | 252                                                                     | 95.9%                  | 94.4%                  |
| Democratic Republic of the Congo | 202                                    | 201                                                                   | 202                                                                     | 99.5%                  | 100.0%                 |
| China                            | 193                                    | 192                                                                   | 191                                                                     | 99.5%                  | 99.0%                  |
| Philippines                      | 171                                    | 167                                                                   | 157                                                                     | 97.7%                  | 91.8%                  |
| Brazil                           | 159                                    | 144                                                                   | 159                                                                     | 90.6%                  | 100.0%                 |
| Australia                        | 143                                    | 127                                                                   | 130                                                                     | 88.8%                  | 90.9%                  |
| Chad                             | 120                                    | 117                                                                   | 111                                                                     | 97.5%                  | 92.5%                  |
| Tanzania                         | 115                                    | 114                                                                   | 111                                                                     | 99.1%                  | 96.5%                  |
| United States                    | 109                                    | 100                                                                   | 92                                                                      | 91.7%                  | 84.4%                  |
| Malaysia                         | 109                                    | 105                                                                   | 105                                                                     | 96.3%                  | 96.3%                  |
| Myanmar                          | 109                                    | 106                                                                   | 109                                                                     | 97.2%                  | 100.0%                 |
| Vanuatu                          | 108                                    | 105                                                                   | 93                                                                      | 97.2%                  | 86.1%                  |
| Nepal                            | 104                                    | 102                                                                   | 102                                                                     | 98.1%                  | 98.1%                  |
| Viet Nam                         | 93                                     | 91                                                                    | 89                                                                      | 97.8%                  | 95.7%                  |
| Russian Federation               | 91                                     | 88                                                                    | 86                                                                      | 96.7%                  | 94.5%                  |
| Peru                             | 88                                     | 82                                                                    | 87                                                                      | 93.2%                  | 98.9%                  |
| Ethiopia                         | 81                                     | 80                                                                    | 80                                                                      | 98.8%                  | 98.8%                  |
| Canada                           | 75                                     | 72                                                                    | 70                                                                      | 96.0%                  | 93.3%                  |
| Côte d'Ivoire                    | 74                                     | 72                                                                    | 70                                                                      | 97.3%                  | 94.6%                  |
| Colombia                         | 73                                     | 58                                                                    | 72                                                                      | 79.5%                  | 98.6%                  |
| Ghana                            | 71                                     | 67                                                                    | 65                                                                      | 94.4%                  | 91.5%                  |
| Solomon Islands                  | 69                                     | 68                                                                    | 57                                                                      | 98.6%                  | 82.6%                  |
| Sudan                            | 67                                     | 67                                                                    | 65                                                                      | 100.0%                 | 97.0%                  |
| Laos                             | 67                                     | 66                                                                    | 67                                                                      | 98.5%                  | 100.0%                 |
| Burkina Faso                     | 66                                     | 61                                                                    | 51                                                                      | 92.4%                  | 77.3%                  |
| Mali                             | 63                                     | 61                                                                    | 26                                                                      | 96.8%                  | 41.3%                  |
| Central African Republic         | 62                                     | 62                                                                    | 62                                                                      | 100.0%                 | 100.0%                 |
| Pakistan                         | 58                                     | 52                                                                    | 46                                                                      | 89.7%                  | 79.3%                  |
| South Sudan                      | 57                                     | 57                                                                    | 57                                                                      | 100.0%                 | 100.0%                 |
| Kenya                            | 56                                     | 47                                                                    | 46                                                                      | 83.9%                  | 82.1%                  |
| Congo                            | 55                                     | 55                                                                    | 55                                                                      | 100.0%                 | 100.0%                 |
| Benin                            | 50                                     | 49                                                                    | 46                                                                      | 98.0%                  | 92.0%                  |
| Thailand                         | 48                                     | 44                                                                    | 45                                                                      | 91.7%                  | 93.8%                  |
| Iran                             | 43                                     | 35                                                                    | 30                                                                      | 81.4%                  | 69.8%                  |
| Togo                             | 40                                     | 36                                                                    | 34                                                                      | 90.0%                  | 85.0%                  |
| Angola                           | 40                                     | 40                                                                    | 40                                                                      | 100.0%                 | 100.0%                 |
| Gabon                            | 40                                     | 38                                                                    | 40                                                                      | 95.0%                  | 100.0%                 |
| Mozambique                       | 40                                     | 40                                                                    | 40                                                                      | 100.0%                 | 100.0%                 |
| Bangladesh                       | 36                                     | 36                                                                    | 33                                                                      | 100.0%                 | 91.7%                  |
| Uganda                           | 36                                     | 36                                                                    | 36                                                                      | 100.0%                 | 100.0%                 |
| Zambia                           | 35                                     | 35                                                                    | 35                                                                      | 100.0%                 | 100.0%                 |

|                   |    |    |    |        |        |
|-------------------|----|----|----|--------|--------|
| New Caledonia     | 33 | 33 | 30 | 100.0% | 90.9%  |
| Senegal           | 31 | 31 | 25 | 100.0% | 80.6%  |
| Guinea            | 31 | 31 | 30 | 100.0% | 96.8%  |
| Venezuela         | 31 | 31 | 31 | 100.0% | 100.0% |
| Afghanistan       | 30 | 28 | 28 | 93.3%  | 93.3%  |
| Bolivia           | 30 | 29 | 30 | 96.7%  | 100.0% |
| Liberia           | 27 | 27 | 27 | 100.0% | 100.0% |
| Botswana          | 26 | 24 | 26 | 92.3%  | 100.0% |
| Guatemala         | 23 | 23 | 23 | 100.0% | 100.0% |
| Italy             | 21 | 20 | 19 | 95.2%  | 90.5%  |
| Bhutan            | 21 | 21 | 21 | 100.0% | 100.0% |
| Namibia           | 21 | 21 | 21 | 100.0% | 100.0% |
| Ecuador           | 20 | 19 | 20 | 95.0%  | 100.0% |
| Niger             | 19 | 15 | 11 | 78.9%  | 57.9%  |
| Cambodia          | 19 | 17 | 17 | 89.5%  | 89.5%  |
| East Timor        | 19 | 18 | 18 | 94.7%  | 94.7%  |
| Guinea-Bissau     | 18 | 18 | 17 | 100.0% | 94.4%  |
| Paraguay          | 18 | 18 | 18 | 100.0% | 100.0% |
| Sierra Leone      | 18 | 18 | 18 | 100.0% | 100.0% |
| Micronesia        | 17 | 17 | 0  | 100.0% | 0.0%   |
| Georgia           | 16 | 15 | 15 | 93.8%  | 93.8%  |
| Germany           | 15 | 15 | 15 | 100.0% | 100.0% |
| Zimbabwe          | 15 | 15 | 15 | 100.0% | 100.0% |
| Algeria           | 13 | 7  | 5  | 53.8%  | 38.5%  |
| China-Taiwan      | 13 | 12 | 12 | 92.3%  | 92.3%  |
| Argentina         | 13 | 13 | 13 | 100.0% | 100.0% |
| Azerbaijan        | 13 | 13 | 13 | 100.0% | 100.0% |
| France            | 13 | 13 | 13 | 100.0% | 100.0% |
| Spain             | 13 | 13 | 13 | 100.0% | 100.0% |
| Japan             | 12 | 12 | 8  | 100.0% | 66.7%  |
| Equatorial Guinea | 12 | 11 | 11 | 91.7%  | 91.7%  |
| Turkey            | 12 | 11 | 11 | 91.7%  | 91.7%  |
| Malawi            | 12 | 12 | 12 | 100.0% | 100.0% |
| Netherlands       | 12 | 12 | 12 | 100.0% | 100.0% |
| South Africa      | 12 | 12 | 12 | 100.0% | 100.0% |
| Iraq              | 11 | 10 | 8  | 90.9%  | 72.7%  |
| Greece            | 11 | 10 | 10 | 90.9%  | 90.9%  |
| Madagascar        | 11 | 11 | 11 | 100.0% | 100.0% |
| Tajikistan        | 11 | 11 | 11 | 100.0% | 100.0% |
| Belgium           | 10 | 10 | 10 | 100.0% | 100.0% |
| Guyana            | 10 | 9  | 10 | 90.0%  | 100.0% |
| Suriname          | 10 | 8  | 10 | 80.0%  | 100.0% |
| Switzerland       | 10 | 10 | 10 | 100.0% | 100.0% |
| Oman              | 10 | 9  | 0  | 90.0%  | 0.0%   |
| Eritrea           | 9  | 9  | 9  | 100.0% | 100.0% |
| Somalia           | 9  | 9  | 9  | 100.0% | 100.0% |
| Fiji              | 8  | 8  | 4  | 100.0% | 50.0%  |
| Morocco           | 8  | 7  | 5  | 87.5%  | 62.5%  |
| Finland           | 8  | 8  | 8  | 100.0% | 100.0% |
| Sweden            | 8  | 8  | 8  | 100.0% | 100.0% |
| Libya             | 7  | 2  | 1  | 28.6%  | 14.3%  |
| Yemen             | 7  | 7  | 3  | 100.0% | 42.9%  |
| Gambia            | 7  | 5  | 5  | 71.4%  | 71.4%  |

|                          |   |   |   |        |        |
|--------------------------|---|---|---|--------|--------|
| Syria                    | 7 | 6 | 5 | 85.7%  | 71.4%  |
| Egypt                    | 7 | 6 | 6 | 85.7%  | 85.7%  |
| Austria                  | 7 | 7 | 7 | 100.0% | 100.0% |
| Brunei                   | 7 | 7 | 7 | 100.0% | 100.0% |
| French Guiana            | 7 | 7 | 7 | 100.0% | 100.0% |
| Panama                   | 7 | 6 | 7 | 85.7%  | 100.0% |
| Ukraine                  | 7 | 7 | 7 | 100.0% | 100.0% |
| French Polynesia         | 7 | 5 | 0 | 71.4%  | 0.0%   |
| Israel                   | 5 | 4 | 2 | 80.0%  | 40.0%  |
| Chile                    | 5 | 4 | 4 | 80.0%  | 80.0%  |
| Mauritania               | 5 | 5 | 4 | 100.0% | 80.0%  |
| Portugal                 | 5 | 5 | 4 | 100.0% | 80.0%  |
| Belize                   | 5 | 5 | 5 | 100.0% | 100.0% |
| Honduras                 | 5 | 5 | 5 | 100.0% | 100.0% |
| Mongolia                 | 5 | 5 | 5 | 100.0% | 100.0% |
| Montenegro               | 5 | 5 | 5 | 100.0% | 100.0% |
| Nicaragua                | 5 | 5 | 5 | 100.0% | 100.0% |
| North Macedonia          | 5 | 5 | 5 | 100.0% | 100.0% |
| Serbia                   | 5 | 5 | 5 | 100.0% | 100.0% |
| Uzbekistan               | 5 | 5 | 5 | 100.0% | 100.0% |
| Albania                  | 4 | 4 | 4 | 100.0% | 100.0% |
| Armenia                  | 4 | 4 | 4 | 100.0% | 100.0% |
| Costa Rica               | 4 | 4 | 4 | 100.0% | 100.0% |
| Kazakhstan               | 4 | 4 | 4 | 100.0% | 100.0% |
| Norway                   | 4 | 3 | 4 | 75.0%  | 100.0% |
| Sri Lanka                | 4 | 4 | 4 | 100.0% | 100.0% |
| United Kingdom           | 4 | 4 | 4 | 100.0% | 100.0% |
| Cook Islands             | 4 | 1 | 0 | 25.0%  | 0.0%   |
| Croatia                  | 3 | 3 | 2 | 100.0% | 66.7%  |
| Jordan                   | 3 | 3 | 2 | 100.0% | 66.7%  |
| Andorra                  | 3 | 3 | 3 | 100.0% | 100.0% |
| Bulgaria                 | 3 | 3 | 3 | 100.0% | 100.0% |
| Czechia                  | 3 | 3 | 3 | 100.0% | 100.0% |
| Hungary                  | 3 | 3 | 3 | 100.0% | 100.0% |
| Lesotho                  | 3 | 3 | 3 | 100.0% | 100.0% |
| Lithuania                | 3 | 3 | 3 | 100.0% | 100.0% |
| Romania                  | 3 | 3 | 3 | 100.0% | 100.0% |
| Saudi Arabia             | 3 | 3 | 3 | 100.0% | 100.0% |
| Slovakia                 | 3 | 3 | 3 | 100.0% | 100.0% |
| Comoros                  | 3 | 3 | 0 | 100.0% | 0.0%   |
| Northern Mariana Islands | 3 | 2 | 0 | 66.7%  | 0.0%   |
| Palau                    | 3 | 3 | 0 | 100.0% | 0.0%   |
| São Tomé and Príncipe    | 3 | 3 | 0 | 100.0% | 0.0%   |
| Cyprus                   | 2 | 2 | 1 | 100.0% | 50.0%  |
| Djibouti                 | 2 | 2 | 1 | 100.0% | 50.0%  |
| Belarus                  | 2 | 2 | 2 | 100.0% | 100.0% |
| China-Hong Kong          | 2 | 2 | 2 | 100.0% | 100.0% |
| Denmark                  | 2 | 2 | 2 | 100.0% | 100.0% |
| Estonia                  | 2 | 2 | 2 | 100.0% | 100.0% |
| Grenada                  | 2 | 2 | 2 | 100.0% | 100.0% |
| Ireland                  | 2 | 2 | 2 | 100.0% | 100.0% |
| Jamaica                  | 2 | 2 | 2 | 100.0% | 100.0% |
| Kyrgyzstan               | 2 | 2 | 2 | 100.0% | 100.0% |

|                                  |   |   |   |        |        |
|----------------------------------|---|---|---|--------|--------|
| Latvia                           | 2 | 2 | 2 | 100.0% | 100.0% |
| Liechtenstein                    | 2 | 2 | 2 | 100.0% | 100.0% |
| Luxembourg                       | 2 | 2 | 2 | 100.0% | 100.0% |
| Moldova                          | 2 | 2 | 2 | 100.0% | 100.0% |
| Palestine                        | 2 | 2 | 2 | 100.0% | 100.0% |
| Poland                           | 2 | 2 | 2 | 100.0% | 100.0% |
| South Korea                      | 2 | 2 | 2 | 100.0% | 100.0% |
| Trinidad and Tobago              | 2 | 2 | 2 | 100.0% | 100.0% |
| Turkmenistan                     | 2 | 2 | 2 | 100.0% | 100.0% |
| Mayotte                          | 2 | 2 | 0 | 100.0% | 0.0%   |
| Tonga                            | 2 | 2 | 0 | 100.0% | 0.0%   |
| Wallis and Futuna                | 2 | 2 | 0 | 100.0% | 0.0%   |
| Western Sahara                   | 2 | 2 | 0 | 100.0% | 0.0%   |
| Aland Islands                    | 1 | 1 | 1 | 100.0% | 100.0% |
| Antigua and Barbuda              | 1 | 1 | 1 | 100.0% | 100.0% |
| Bahamas                          | 1 | 1 | 1 | 100.0% | 100.0% |
| Barbados                         | 1 | 1 | 1 | 100.0% | 100.0% |
| Bosnia and Herzegovina           | 1 | 1 | 1 | 100.0% | 100.0% |
| British Virgin Islands           | 1 | 1 | 1 | 100.0% | 100.0% |
| Burundi                          | 1 | 1 | 1 | 100.0% | 100.0% |
| China-Macao                      | 1 | 1 | 1 | 100.0% | 100.0% |
| Curaçao                          | 1 | 1 | 1 | 100.0% | 100.0% |
| Dominica                         | 1 | 1 | 1 | 100.0% | 100.0% |
| El Salvador                      | 1 | 1 | 1 | 100.0% | 100.0% |
| Eswatini                         | 1 | 1 | 1 | 100.0% | 100.0% |
| Guadeloupe                       | 1 | 1 | 1 | 100.0% | 100.0% |
| Haiti                            | 1 | 1 | 1 | 100.0% | 100.0% |
| Iceland                          | 1 | 1 | 1 | 100.0% | 100.0% |
| Isle of Man                      | 1 | 1 | 1 | 100.0% | 100.0% |
| Jersey                           | 1 | 1 | 1 | 100.0% | 100.0% |
| Kuwait                           | 1 | 1 | 1 | 100.0% | 100.0% |
| Lebanon                          | 1 | 1 | 1 | 100.0% | 100.0% |
| Malta                            | 1 | 1 | 1 | 100.0% | 100.0% |
| Martinique                       | 1 | 1 | 1 | 100.0% | 100.0% |
| Montserrat                       | 1 | 1 | 1 | 100.0% | 100.0% |
| New Zealand                      | 1 | 1 | 1 | 100.0% | 100.0% |
| North Korea                      | 1 | 1 | 1 | 100.0% | 100.0% |
| Rwanda                           | 1 | 1 | 1 | 100.0% | 100.0% |
| Saint Kitts and Nevis            | 1 | 1 | 1 | 100.0% | 100.0% |
| Saint Lucia                      | 1 | 1 | 1 | 100.0% | 100.0% |
| Saint Martin                     | 1 | 1 | 1 | 100.0% | 100.0% |
| Saint Vincent and the Grenadines | 1 | 1 | 1 | 100.0% | 100.0% |
| Slovenia                         | 1 | 1 | 1 | 100.0% | 100.0% |
| Tunisia                          | 1 | 1 | 1 | 100.0% | 100.0% |
| Turks and Caicos Islands         | 1 | 1 | 1 | 100.0% | 100.0% |
| U.S. Virgin Islands              | 1 | 1 | 1 | 100.0% | 100.0% |
| American Samoa                   | 1 | 1 | 0 | 100.0% | 0.0%   |
| Anguilla                         | 1 | 1 | 0 | 100.0% | 0.0%   |
| Aruba                            | 1 | 1 | 0 | 100.0% | 0.0%   |
| Bahrain                          | 1 | 1 | 0 | 100.0% | 0.0%   |
| Cape Verde Islands               | 1 | 1 | 0 | 100.0% | 0.0%   |
| Cocos (Keeling) Islands          | 1 | 1 | 0 | 100.0% | 0.0%   |
| Faroe Islands                    | 1 | 1 | 0 | 100.0% | 0.0%   |

|                          |       |   |   |        |      |
|--------------------------|-------|---|---|--------|------|
| Gibraltar                | 1     | 1 | 0 | 100.0% | 0.0% |
| Greenland                | 1     | 1 | 0 | 100.0% | 0.0% |
| Guam                     | 1     | 1 | 0 | 100.0% | 0.0% |
| Kiribati                 | 1     | 1 | 0 | 100.0% | 0.0% |
| Maldives                 | 1     | 1 | 0 | 100.0% | 0.0% |
| Marshall Islands         | 1     | 1 | 0 | 100.0% | 0.0% |
| Mauritius                | 1     | 1 | 0 | 100.0% | 0.0% |
| Monaco                   | 1     | 1 | 0 | 100.0% | 0.0% |
| Nauru                    | 1     | 1 | 0 | 100.0% | 0.0% |
| Niue                     | 1     | 1 | 0 | 100.0% | 0.0% |
| Norfolk Island           | 1     | 1 | 0 | 100.0% | 0.0% |
| Qatar                    | 1     | 1 | 0 | 100.0% | 0.0% |
| RÅ©union                 | 1     | 1 | 0 | 100.0% | 0.0% |
| Samoa                    | 1     | 1 | 0 | 100.0% | 0.0% |
| San Marino               | 1     | 0 | 0 | 0.0%   | 0.0% |
| Seychelles               | 1     | 1 | 0 | 100.0% | 0.0% |
| Singapore                | 1     | 1 | 0 | 100.0% | 0.0% |
| Tokelau                  | 1     | 1 | 0 | 100.0% | 0.0% |
| Tuvalu                   | 1     | 1 | 0 | 100.0% | 0.0% |
| United Arab Emirates     | 1     | 1 | 0 | 100.0% | 0.0% |
| Grand Total <sup>1</sup> | 7,410 |   |   |        |      |

1: Total here does not equal total languages intersected for entire dataset as some languages occur in multiple countries.

Total Languages: 7,117

Total Indigenous Languages defined by Polygons: 6,474

Language Dataset: *Ethnologue* , 23<sup>rd</sup> edition
